# Supplementary material for: Mixed effects approach to the analysis of the stepped wedge cluster randomised trial—Investigating the confounding effect of time through simulation
Source: PLoS One. 2018 Dec 13;13(12):e0208876. doi: 10.1371/journal.pone.0208876 (PMC6292598; doi:10.1371/journal.pone.0208876)
Supplement: S1 Data — (XLSX) [file pone.0208876.s005.xlsx]

## Sheet: OXTEXT 7 Data
HONOS_Score	Treatment_Arm	Study_Month	Exposure_Month	Centre	PatID
13	Control	6	0	Centre_1	Patient_1
17	Control	5	0	Centre_1	Patient_2
6	Control	2	0	Centre_1	Patient_3
13	Control	3	0	Centre_1	Patient_4
6	Control	3	0	Centre_1	Patient_5
7	Control	6	0	Centre_1	Patient_6
18	Control	1	0	Centre_1	Patient_7
23	Control	6	0	Centre_1	Patient_8
17	Control	2	0	Centre_1	Patient_9
16	Control	3	0	Centre_1	Patient_5
10.5	Control	6	0	Centre_1	Patient_10
21	Control	7	0	Centre_1	Patient_11
6	Control	1	0	Centre_1	Patient_12
7	Control	4	0	Centre_1	Patient_13
29.4545	Control	2	0	Centre_1	Patient_14
23	Control	3	0	Centre_1	Patient_15
15	Control	5	0	Centre_1	Patient_9
4	Control	1	0	Centre_1	Patient_16
21	Control	6	0	Centre_1	Patient_9
12	Control	4	0	Centre_1	Patient_17
18	Control	3	0	Centre_1	Patient_13
13	Control	6	0	Centre_1	Patient_10
12	Control	6	0	Centre_1	Patient_6
11	Control	5	0	Centre_1	Patient_18
14	Control	2	0	Centre_1	Patient_12
19	Control	5	0	Centre_1	Patient_13
22	Control	5	0	Centre_1	Patient_19
14	Control	3	0	Centre_1	Patient_20
17	Control	4	0	Centre_1	Patient_21
13	Control	2	0	Centre_1	Patient_22
15	Control	2	0	Centre_1	Patient_14
12	Control	6	0	Centre_1	Patient_23
5	Control	6	0	Centre_1	Patient_24
11	Control	5	0	Centre_1	Patient_25
21	Control	3	0	Centre_1	Patient_26
14	Control	2	0	Centre_1	Patient_2
23	Control	4	0	Centre_1	Patient_5
7	Control	2	0	Centre_1	Patient_27
13	Control	6	0	Centre_1	Patient_28
15	Control	2	0	Centre_1	Patient_11
21	Control	6	0	Centre_1	Patient_9
14	Control	4	0	Centre_1	Patient_7
9	Control	5	0	Centre_1	Patient_13
11	Control	3	0	Centre_1	Patient_29
26	Control	7	0	Centre_1	Patient_30
8	Control	2	0	Centre_1	Patient_25
9	Control	2	0	Centre_1	Patient_31
16	Control	4	0	Centre_1	Patient_32
10	Control	1	0	Centre_1	Patient_26
19	Control	2	0	Centre_1	Patient_33
16	Control	2	0	Centre_1	Patient_34
30	Control	7	0	Centre_1	Patient_35
19	Control	2	0	Centre_1	Patient_36
15	Control	4	0	Centre_1	Patient_2
13	Control	4	0	Centre_1	Patient_37
14	Control	2	0	Centre_1	Patient_2
26.1818	Control	2	0	Centre_1	Patient_9
15	Control	1	0	Centre_1	Patient_31
15	Control	5	0	Centre_1	Patient_38
11	Control	2	0	Centre_1	Patient_9
20	Control	6	0	Centre_1	Patient_39
20	Control	6	0	Centre_1	Patient_3
20	Control	4	0	Centre_1	Patient_9
26	Control	3	0	Centre_1	Patient_15
30	Control	7	0	Centre_1	Patient_35
10	Control	5	0	Centre_1	Patient_40
3	Control	7	0	Centre_1	Patient_41
26	Control	3	0	Centre_1	Patient_41
8	Control	2	0	Centre_1	Patient_41
4	Control	2	0	Centre_1	Patient_25
17	Control	4	0	Centre_1	Patient_42
27	Control	2	0	Centre_1	Patient_43
13	Control	6	0	Centre_1	Patient_12
18	Control	6	0	Centre_1	Patient_4
22	Control	5	0	Centre_1	Patient_21
11	Control	2	0	Centre_1	Patient_5
12	Control	4	0	Centre_1	Patient_2
7	Control	6	0	Centre_1	Patient_6
12	Control	7	0	Centre_1	Patient_2
14.1818	Control	7	0	Centre_1	Patient_9
18	Control	5	0	Centre_1	Patient_44
4	Control	1	0	Centre_1	Patient_12
21	Control	4	0	Centre_1	Patient_2
12	Control	8	0	Centre_2	Patient_45
11	Control	10	0	Centre_2	Patient_45
9	Control	8	0	Centre_2	Patient_46
20	Control	11	0	Centre_2	Patient_47
13.5	Control	7	0	Centre_2	Patient_46
18	Control	7	0	Centre_2	Patient_48
9	Control	4	0	Centre_2	Patient_49
17	Control	5	0	Centre_2	Patient_50
18	Control	7	0	Centre_2	Patient_51
13	Control	10	0	Centre_2	Patient_52
6	Control	3	0	Centre_2	Patient_53
20	Control	5	0	Centre_2	Patient_54
9	Control	6	0	Centre_2	Patient_55
7	Control	3	0	Centre_2	Patient_56
20.7273	Control	5	0	Centre_2	Patient_57
4	Control	3	0	Centre_2	Patient_58
28	Control	1	0	Centre_2	Patient_59
8	Control	4	0	Centre_2	Patient_48
16	Control	4	0	Centre_2	Patient_60
21	Control	9	0	Centre_2	Patient_61
11	Control	9	0	Centre_2	Patient_62
5	Control	4	0	Centre_2	Patient_63
20.5714	Control	10	0	Centre_2	Patient_47
15	Control	10	0	Centre_2	Patient_64
14	Control	10	0	Centre_2	Patient_65
5	Control	4	0	Centre_2	Patient_66
26	Control	9	0	Centre_2	Patient_46
28	Control	10	0	Centre_2	Patient_67
9	Control	9	0	Centre_2	Patient_68
2	Control	8	0	Centre_2	Patient_69
12	Control	8	0	Centre_2	Patient_70
13	Control	5	0	Centre_2	Patient_71
0	Control	8	0	Centre_2	Patient_72
15	Control	11	0	Centre_2	Patient_73
14	Control	5	0	Centre_2	Patient_74
4	Control	10	0	Centre_2	Patient_75
15	Control	11	0	Centre_2	Patient_76
22	Control	11	0	Centre_2	Patient_77
12	Control	8	0	Centre_2	Patient_78
24	Control	5	0	Centre_2	Patient_79
11	Control	9	0	Centre_2	Patient_80
10	Control	3	0	Centre_2	Patient_81
9	Control	7	0	Centre_2	Patient_66
6	Control	4	0	Centre_2	Patient_70
7	Control	7	0	Centre_2	Patient_82
20	Control	10	0	Centre_2	Patient_83
17.4545	Control	1	0	Centre_2	Patient_84
13	Control	8	0	Centre_2	Patient_56
2	Control	5	0	Centre_2	Patient_85
20	Control	9	0	Centre_2	Patient_86
0	Control	4	0	Centre_2	Patient_87
15	Control	3	0	Centre_2	Patient_88
7	Control	4	0	Centre_2	Patient_89
9	Control	8	0	Centre_2	Patient_90
12	Control	9	0	Centre_2	Patient_91
20	Control	9	0	Centre_2	Patient_71
12	Control	3	0	Centre_2	Patient_81
9	Control	11	0	Centre_2	Patient_92
6	Control	10	0	Centre_2	Patient_73
0	Control	4	0	Centre_2	Patient_93
17	Control	2	0	Centre_2	Patient_51
9	Control	6	0	Centre_2	Patient_94
11	Control	4	0	Centre_2	Patient_95
5	Control	8	0	Centre_2	Patient_96
15	Control	6	0	Centre_2	Patient_97
16	Control	4	0	Centre_2	Patient_98
15	Control	10	0	Centre_2	Patient_99
13	Control	9	0	Centre_2	Patient_100
1	Control	9	0	Centre_2	Patient_101
9	Control	8	0	Centre_2	Patient_102
16	Control	6	0	Centre_2	Patient_103
12	Control	5	0	Centre_2	Patient_70
21	Control	11	0	Centre_2	Patient_104
14	Control	5	0	Centre_2	Patient_105
21	Control	1	0	Centre_2	Patient_103
8	Control	6	0	Centre_2	Patient_106
14	Control	6	0	Centre_2	Patient_70
19	Control	6	0	Centre_2	Patient_107
3	Control	8	0	Centre_2	Patient_108
9	Control	7	0	Centre_2	Patient_46
4	Control	5	0	Centre_2	Patient_109
8	Control	6	0	Centre_2	Patient_110
7	Control	9	0	Centre_2	Patient_111
10	Control	2	0	Centre_2	Patient_112
10.9091	Control	5	0	Centre_2	Patient_56
3	Control	1	0	Centre_2	Patient_113
26	Control	7	0	Centre_2	Patient_114
16	Control	1	0	Centre_2	Patient_115
10	Control	6	0	Centre_2	Patient_116
16	Control	9	0	Centre_2	Patient_117
0	Control	3	0	Centre_2	Patient_118
5	Control	8	0	Centre_2	Patient_109
12	Control	8	0	Centre_2	Patient_103
21.8182	Control	10	0	Centre_2	Patient_119
5	Control	8	0	Centre_2	Patient_76
13	Control	4	0	Centre_2	Patient_66
17	Control	8	0	Centre_2	Patient_73
19	Control	6	0	Centre_2	Patient_120
4	Control	4	0	Centre_2	Patient_121
27	Control	10	0	Centre_2	Patient_54
13.3333	Control	7	0	Centre_2	Patient_96
6	Control	3	0	Centre_2	Patient_122
12	Control	3	0	Centre_2	Patient_123
12	Control	10	0	Centre_2	Patient_120
11	Control	8	0	Centre_2	Patient_85
7	Control	1	0	Centre_2	Patient_55
11	Control	5	0	Centre_2	Patient_124
8	Control	10	0	Centre_2	Patient_125
4	Control	3	0	Centre_2	Patient_126
8	Control	3	0	Centre_2	Patient_127
10	Control	2	0	Centre_2	Patient_81
16.3636	Control	10	0	Centre_2	Patient_73
13	Control	9	0	Centre_2	Patient_128
13	Control	5	0	Centre_2	Patient_129
5	Control	4	0	Centre_2	Patient_130
32	Control	7	0	Centre_2	Patient_98
17	Control	8	0	Centre_2	Patient_104
6	Control	3	0	Centre_2	Patient_131
3	Control	4	0	Centre_2	Patient_132
17	Control	2	0	Centre_2	Patient_133
9	Control	11	0	Centre_2	Patient_49
25	Control	11	0	Centre_2	Patient_134
17	Control	9	0	Centre_2	Patient_79
17.4545	Control	10	0	Centre_2	Patient_73
12	Control	7	0	Centre_2	Patient_135
11	Control	3	0	Centre_2	Patient_81
27	Control	10	0	Centre_2	Patient_54
21	Control	9	0	Centre_2	Patient_112
13	Control	1	0	Centre_2	Patient_136
7	Control	6	0	Centre_2	Patient_137
16	Control	1	0	Centre_2	Patient_51
12	Control	2	0	Centre_2	Patient_138
32	Control	9	0	Centre_2	Patient_98
12	Control	8	0	Centre_2	Patient_139
18	Control	5	0	Centre_2	Patient_103
10	Control	1	0	Centre_2	Patient_140
29	Control	4	0	Centre_2	Patient_112
15	Control	3	0	Centre_2	Patient_141
17	Control	3	0	Centre_2	Patient_64
7	Control	3	0	Centre_2	Patient_133
23	Control	8	0	Centre_2	Patient_98
19	Control	9	0	Centre_2	Patient_142
10	Control	4	0	Centre_2	Patient_102
9	Control	9	0	Centre_2	Patient_143
7	Control	4	0	Centre_2	Patient_144
5	Control	7	0	Centre_2	Patient_145
3	Control	2	0	Centre_2	Patient_146
13	Control	7	0	Centre_2	Patient_121
21	Control	9	0	Centre_2	Patient_147
16	Control	8	0	Centre_2	Patient_148
15	Control	1	0	Centre_2	Patient_97
18	Control	1	0	Centre_2	Patient_84
17	Control	4	0	Centre_2	Patient_81
26	Control	9	0	Centre_2	Patient_131
10	Control	1	0	Centre_2	Patient_60
7	Control	3	0	Centre_2	Patient_149
2	Control	5	0	Centre_2	Patient_150
24	Control	1	0	Centre_2	Patient_151
17	Control	9	0	Centre_2	Patient_152
9	Control	2	0	Centre_2	Patient_45
14	Control	6	0	Centre_2	Patient_135
7	Control	5	0	Centre_2	Patient_153
11	Control	4	0	Centre_2	Patient_154
13	Control	2	0	Centre_2	Patient_155
17	Control	11	0	Centre_2	Patient_81
12	Control	5	0	Centre_2	Patient_90
17	Control	3	0	Centre_2	Patient_156
18	Control	9	0	Centre_2	Patient_123
10	Control	10	0	Centre_2	Patient_157
6	Control	6	0	Centre_2	Patient_151
9	Control	6	0	Centre_2	Patient_65
2	Control	4	0	Centre_2	Patient_143
5	Control	4	0	Centre_2	Patient_158
5	Control	4	0	Centre_2	Patient_159
9	Control	6	0	Centre_2	Patient_160
17	Control	10	0	Centre_2	Patient_80
14.6667	Control	8	0	Centre_2	Patient_161
26	Control	10	0	Centre_2	Patient_105
22	Control	7	0	Centre_2	Patient_162
28	Control	3	0	Centre_2	Patient_163
9	Control	4	0	Centre_2	Patient_70
12	Control	11	0	Centre_2	Patient_164
8	Control	4	0	Centre_2	Patient_98
23	Control	10	0	Centre_2	Patient_115
20	Control	11	0	Centre_2	Patient_119
18	Control	6	0	Centre_2	Patient_82
17	Control	5	0	Centre_2	Patient_165
21	Control	9	0	Centre_2	Patient_166
11	Control	4	0	Centre_2	Patient_151
16	Control	4	0	Centre_2	Patient_167
13	Control	8	0	Centre_2	Patient_159
9	Control	7	0	Centre_2	Patient_168
7	Control	10	0	Centre_2	Patient_146
10	Control	2	0	Centre_2	Patient_65
20	Control	3	0	Centre_2	Patient_151
5	Control	5	0	Centre_2	Patient_133
15	Control	6	0	Centre_2	Patient_135
22	Control	1	0	Centre_2	Patient_104
11	Control	11	0	Centre_2	Patient_169
5	Control	5	0	Centre_2	Patient_48
6	Control	6	0	Centre_2	Patient_170
8	Control	7	0	Centre_2	Patient_56
10	Control	10	0	Centre_2	Patient_159
14	Control	10	0	Centre_2	Patient_161
10	Control	7	0	Centre_2	Patient_171
17	Control	3	0	Centre_2	Patient_105
8	Control	4	0	Centre_2	Patient_172
14	Control	6	0	Centre_2	Patient_79
10	Control	10	0	Centre_2	Patient_173
13	Control	11	0	Centre_2	Patient_141
15	Control	6	0	Centre_2	Patient_107
11	Control	4	0	Centre_2	Patient_174
20	Control	5	0	Centre_2	Patient_115
11	Control	1	0	Centre_2	Patient_175
11	Control	2	0	Centre_2	Patient_121
8	Control	3	0	Centre_2	Patient_112
5	Control	3	0	Centre_2	Patient_109
18	Control	7	0	Centre_2	Patient_163
20	Control	11	0	Centre_2	Patient_176
13	Control	9	0	Centre_2	Patient_177
11	Control	8	0	Centre_2	Patient_52
17	Control	6	0	Centre_2	Patient_82
10	Control	4	0	Centre_2	Patient_99
14	Control	9	0	Centre_2	Patient_178
8	Control	7	0	Centre_2	Patient_171
5	Control	8	0	Centre_2	Patient_96
14.1818	Control	9	0	Centre_2	Patient_161
24	Control	11	0	Centre_2	Patient_179
26	Control	9	0	Centre_2	Patient_179
17	Control	4	0	Centre_2	Patient_148
10	Control	7	0	Centre_2	Patient_155
7	Control	7	0	Centre_2	Patient_104
4	Control	3	0	Centre_2	Patient_180
6	Control	5	0	Centre_2	Patient_109
6	Control	3	0	Centre_2	Patient_109
16.3636	Control	8	0	Centre_2	Patient_96
7	Control	10	0	Centre_2	Patient_181
9	Control	10	0	Centre_2	Patient_182
14.4	Control	8	0	Centre_2	Patient_98
6	Control	1	0	Centre_2	Patient_133
17	Control	4	0	Centre_2	Patient_134
13	Control	6	0	Centre_2	Patient_183
0	Control	5	0	Centre_2	Patient_184
24	Control	1	0	Centre_2	Patient_185
20	Control	7	0	Centre_2	Patient_151
7	Control	10	0	Centre_2	Patient_157
13	Control	4	0	Centre_2	Patient_133
17	Control	9	0	Centre_2	Patient_84
16	Control	2	0	Centre_2	Patient_135
1	Control	5	0	Centre_2	Patient_132
8	Control	5	0	Centre_2	Patient_173
12	Control	10	0	Centre_2	Patient_65
5	Control	11	0	Centre_2	Patient_74
18	Control	5	0	Centre_2	Patient_70
8	Control	5	0	Centre_2	Patient_186
12	Control	8	0	Centre_2	Patient_70
0	Control	10	0	Centre_2	Patient_61
11	Control	7	0	Centre_2	Patient_96
9	Control	3	0	Centre_2	Patient_75
24	Control	3	0	Centre_2	Patient_54
14	Control	11	0	Centre_2	Patient_99
11	Control	8	0	Centre_2	Patient_187
18	Control	10	0	Centre_2	Patient_115
9	Control	3	0	Centre_2	Patient_188
18	Control	10	0	Centre_2	Patient_79
15	Control	5	0	Centre_2	Patient_189
8	Control	8	0	Centre_2	Patient_175
20	Control	7	0	Centre_2	Patient_103
0	Control	8	0	Centre_2	Patient_109
1	Control	2	0	Centre_2	Patient_185
12	Control	11	0	Centre_2	Patient_76
7	Control	9	0	Centre_2	Patient_118
6	Control	9	0	Centre_2	Patient_190
12	Control	4	0	Centre_2	Patient_191
11	Control	8	0	Centre_2	Patient_46
8	Control	5	0	Centre_2	Patient_115
5	Control	1	0	Centre_2	Patient_72
14.1818	Control	9	0	Centre_2	Patient_161
18	Control	11	0	Centre_2	Patient_177
28	Control	9	0	Centre_2	Patient_192
10.5	Control	9	0	Centre_2	Patient_193
10	Control	4	0	Centre_2	Patient_194
6	Control	4	0	Centre_2	Patient_70
15	Control	4	0	Centre_2	Patient_164
8	Control	6	0	Centre_2	Patient_195
3	Control	1	0	Centre_2	Patient_109
17.4545	Control	8	0	Centre_2	Patient_98
6	Control	9	0	Centre_2	Patient_110
5	Control	8	0	Centre_3	Patient_196
15	Control	7	0	Centre_3	Patient_197
18.5455	Control	1	0	Centre_3	Patient_198
17	Control	5	0	Centre_3	Patient_199
23	Control	10	0	Centre_3	Patient_200
10	Control	3	0	Centre_3	Patient_201
1	Control	5	0	Centre_3	Patient_202
22.9091	Control	2	0	Centre_3	Patient_203
7	Control	3	0	Centre_3	Patient_204
22	Control	8	0	Centre_3	Patient_205
15	Control	10	0	Centre_3	Patient_206
7	Control	5	0	Centre_3	Patient_207
16	Control	5	0	Centre_3	Patient_208
7	Control	8	0	Centre_3	Patient_196
12	Control	6	0	Centre_3	Patient_209
11	Control	6	0	Centre_3	Patient_202
15	Control	4	0	Centre_3	Patient_210
21	Control	8	0	Centre_3	Patient_211
11	Control	6	0	Centre_3	Patient_212
9	Control	10	0	Centre_3	Patient_213
15	Control	10	0	Centre_3	Patient_214
16	Control	1	0	Centre_3	Patient_215
14	Control	5	0	Centre_3	Patient_216
18	Control	3	0	Centre_3	Patient_208
4	Control	2	0	Centre_3	Patient_216
12	Control	7	0	Centre_3	Patient_208
19	Control	4	0	Centre_3	Patient_199
12	Control	5	0	Centre_3	Patient_210
5	Control	4	0	Centre_3	Patient_207
11	Control	2	0	Centre_3	Patient_217
6	Control	8	0	Centre_3	Patient_202
19	Control	7	0	Centre_3	Patient_218
26	Control	2	0	Centre_3	Patient_199
6	Control	5	0	Centre_3	Patient_216
6	Control	4	0	Centre_3	Patient_211
12	Control	1	0	Centre_3	Patient_219
13	Control	6	0	Centre_3	Patient_216
4	Control	8	0	Centre_3	Patient_220
14	Control	10	0	Centre_3	Patient_221
12	Control	10	0	Centre_3	Patient_222
19	Control	6	0	Centre_3	Patient_223
14	Control	10	0	Centre_3	Patient_224
3	Control	8	0	Centre_3	Patient_225
10	Control	6	0	Centre_3	Patient_226
28	Control	8	0	Centre_3	Patient_211
20	Control	4	0	Centre_3	Patient_227
6	Control	10	0	Centre_3	Patient_228
15	Control	1	0	Centre_3	Patient_226
0	Control	7	0	Centre_3	Patient_229
3	Control	3	0	Centre_3	Patient_230
9	Control	6	0	Centre_3	Patient_231
21	Control	7	0	Centre_3	Patient_232
9	Control	7	0	Centre_3	Patient_233
3	Control	1	0	Centre_3	Patient_234
5	Control	3	0	Centre_3	Patient_235
10	Control	9	0	Centre_3	Patient_197
32	Control	4	0	Centre_3	Patient_231
11	Control	5	0	Centre_3	Patient_236
20	Control	6	0	Centre_3	Patient_209
2	Control	2	0	Centre_3	Patient_202
10	Control	10	0	Centre_3	Patient_237
24	Control	1	0	Centre_3	Patient_199
14.6667	Control	4	0	Centre_3	Patient_211
17	Control	4	0	Centre_3	Patient_231
3	Control	5	0	Centre_3	Patient_229
13	Control	10	0	Centre_3	Patient_238
11	Control	5	0	Centre_3	Patient_203
7	Control	10	0	Centre_3	Patient_239
11	Control	6	0	Centre_3	Patient_240
5	Control	10	0	Centre_3	Patient_232
10	Control	4	0	Centre_3	Patient_239
9	Control	8	0	Centre_3	Patient_241
18	Control	3	0	Centre_3	Patient_226
8	Control	2	0	Centre_3	Patient_210
15	Control	2	0	Centre_3	Patient_242
14	Control	8	0	Centre_3	Patient_202
21	Control	8	0	Centre_3	Patient_243
22	Control	9	0	Centre_3	Patient_214
13	Control	8	0	Centre_3	Patient_244
9	Control	10	0	Centre_3	Patient_216
9	Control	5	0	Centre_3	Patient_212
6	Control	5	0	Centre_3	Patient_216
10	Control	4	0	Centre_3	Patient_203
14	Control	4	0	Centre_3	Patient_224
11	Control	7	0	Centre_3	Patient_224
20	Control	4	0	Centre_3	Patient_203
8	Control	5	0	Centre_3	Patient_229
19	Control	4	0	Centre_3	Patient_205
7	Control	10	0	Centre_3	Patient_233
3	Control	8	0	Centre_3	Patient_228
21	Control	10	0	Centre_3	Patient_200
8	Control	9	0	Centre_3	Patient_239
17	Control	5	0	Centre_3	Patient_209
25	Control	7	0	Centre_3	Patient_216
18	Control	9	0	Centre_3	Patient_232
24	Control	7	0	Centre_3	Patient_198
14	Control	3	0	Centre_3	Patient_240
11	Control	4	0	Centre_3	Patient_199
4	Control	5	0	Centre_3	Patient_204
17	Control	3	0	Centre_3	Patient_209
10	Control	2	0	Centre_3	Patient_245
8	Control	9	0	Centre_3	Patient_225
17	Control	7	0	Centre_3	Patient_201
5	Control	7	0	Centre_3	Patient_196
18	Control	7	0	Centre_3	Patient_196
8	Control	1	0	Centre_3	Patient_246
21	Control	9	0	Centre_3	Patient_216
12	Control	6	0	Centre_3	Patient_231
14	Control	8	0	Centre_3	Patient_218
17	Control	5	0	Centre_3	Patient_223
11	Control	7	0	Centre_3	Patient_247
12	Control	7	0	Centre_3	Patient_201
18	Control	2	0	Centre_3	Patient_209
19	Control	2	0	Centre_3	Patient_248
10	Control	3	0	Centre_3	Patient_208
8	Control	6	0	Centre_3	Patient_212
11	Control	9	0	Centre_3	Patient_201
7	Control	8	0	Centre_3	Patient_202
28	Control	10	0	Centre_3	Patient_249
19	Control	4	0	Centre_3	Patient_240
18	Control	2	0	Centre_3	Patient_244
12	Control	7	0	Centre_3	Patient_223
15	Control	6	0	Centre_3	Patient_197
16	Control	9	0	Centre_3	Patient_208
10	Control	6	0	Centre_3	Patient_209
12	Control	7	0	Centre_3	Patient_196
16	Control	1	0	Centre_3	Patient_222
6	Control	10	0	Centre_3	Patient_250
11	Control	8	0	Centre_3	Patient_251
0	Control	4	0	Centre_3	Patient_225
8	Control	3	0	Centre_3	Patient_210
10	Control	7	0	Centre_3	Patient_252
17	Control	5	0	Centre_3	Patient_253
8	Control	3	0	Centre_3	Patient_203
17	Control	8	0	Centre_3	Patient_220
10	Control	8	0	Centre_3	Patient_243
9	Control	9	0	Centre_3	Patient_212
17	Control	10	0	Centre_3	Patient_254
17	Control	10	0	Centre_3	Patient_231
11	Control	8	0	Centre_3	Patient_255
15	Control	7	0	Centre_3	Patient_209
19	Control	1	0	Centre_3	Patient_205
9	Control	7	0	Centre_3	Patient_233
7	Control	2	0	Centre_3	Patient_208
18	Control	9	0	Centre_3	Patient_211
21	Control	2	0	Centre_3	Patient_256
22.9091	Control	10	0	Centre_3	Patient_249
16	Control	7	0	Centre_3	Patient_257
8	Control	7	0	Centre_3	Patient_224
8	Control	3	0	Centre_3	Patient_258
9	Control	3	0	Centre_3	Patient_209
16	Control	7	0	Centre_3	Patient_208
9	Control	9	0	Centre_3	Patient_259
6	Control	9	0	Centre_3	Patient_225
19.2	Control	6	0	Centre_3	Patient_228
5	Control	10	0	Centre_3	Patient_230
33	Control	7	0	Centre_3	Patient_260
0	Control	9	0	Centre_3	Patient_254
16	Control	2	0	Centre_3	Patient_261
18	Control	4	0	Centre_3	Patient_240
7	Control	5	0	Centre_3	Patient_209
0	Control	6	0	Centre_3	Patient_262
7	Control	4	0	Centre_3	Patient_263
26.4	Control	7	0	Centre_3	Patient_225
8	Control	9	0	Centre_3	Patient_230
12	Control	5	0	Centre_3	Patient_210
9	Control	10	0	Centre_3	Patient_240
8	Control	9	0	Centre_3	Patient_262
10	Control	10	0	Centre_3	Patient_217
12	Control	9	0	Centre_3	Patient_216
2	Control	9	0	Centre_3	Patient_258
11	Control	5	0	Centre_3	Patient_250
6	Control	9	0	Centre_3	Patient_232
18	Control	10	0	Centre_3	Patient_235
7.2	Control	8	0	Centre_3	Patient_228
21	Control	9	0	Centre_3	Patient_200
6	Control	5	0	Centre_4	Patient_264
10	Control	6	0	Centre_4	Patient_265
0	Control	1	0	Centre_4	Patient_266
14	Control	4	0	Centre_4	Patient_267
25	Control	9	0	Centre_4	Patient_268
8	Control	3	0	Centre_4	Patient_265
0	Control	1	0	Centre_4	Patient_269
6	Control	4	0	Centre_4	Patient_270
10	Control	1	0	Centre_4	Patient_271
14	Control	1	0	Centre_4	Patient_272
10	Control	5	0	Centre_4	Patient_270
21	Control	1	0	Centre_4	Patient_265
6	Control	1	0	Centre_4	Patient_273
17	Control	5	0	Centre_4	Patient_274
15	Control	9	0	Centre_4	Patient_275
31	Control	8	0	Centre_4	Patient_276
2	Control	2	0	Centre_4	Patient_274
17	Control	5	0	Centre_4	Patient_277
5	Control	5	0	Centre_4	Patient_278
15	Control	5	0	Centre_4	Patient_279
16	Control	2	0	Centre_4	Patient_280
6	Control	1	0	Centre_4	Patient_281
20	Control	9	0	Centre_4	Patient_282
7	Control	4	0	Centre_4	Patient_283
17	Control	8	0	Centre_4	Patient_284
16	Control	6	0	Centre_4	Patient_285
24	Control	3	0	Centre_4	Patient_286
8	Control	5	0	Centre_4	Patient_287
17	Control	4	0	Centre_4	Patient_288
4	Control	9	0	Centre_4	Patient_289
14	Control	5	0	Centre_4	Patient_285
12	Control	6	0	Centre_4	Patient_290
9	Control	3	0	Centre_4	Patient_291
22.8	Control	2	0	Centre_4	Patient_277
27	Control	4	0	Centre_4	Patient_292
6	Control	7	0	Centre_4	Patient_293
14	Control	5	0	Centre_4	Patient_294
11	Control	4	0	Centre_4	Patient_295
5	Control	7	0	Centre_4	Patient_280
8	Control	1	0	Centre_4	Patient_291
29.4545	Control	3	0	Centre_4	Patient_277
17	Control	9	0	Centre_4	Patient_289
10	Control	7	0	Centre_4	Patient_296
7	Control	5	0	Centre_4	Patient_297
14	Control	9	0	Centre_4	Patient_298
32	Control	7	0	Centre_4	Patient_299
10	Control	1	0	Centre_4	Patient_300
12	Control	2	0	Centre_4	Patient_301
9	Control	5	0	Centre_4	Patient_302
24	Control	3	0	Centre_4	Patient_303
14	Control	5	0	Centre_4	Patient_304
4.36364	Control	8	0	Centre_4	Patient_289
13	Control	6	0	Centre_4	Patient_290
16	Control	1	0	Centre_4	Patient_283
15	Control	4	0	Centre_4	Patient_277
9	Control	8	0	Centre_4	Patient_305
7	Control	6	0	Centre_4	Patient_306
9	Control	2	0	Centre_4	Patient_290
11	Control	4	0	Centre_4	Patient_279
12	Control	1	0	Centre_4	Patient_285
14	Control	2	0	Centre_4	Patient_293
4	Control	2	0	Centre_4	Patient_307
4	Control	2	0	Centre_4	Patient_308
16	Control	4	0	Centre_4	Patient_309
7	Control	6	0	Centre_4	Patient_310
13	Control	5	0	Centre_4	Patient_311
28	Control	3	0	Centre_4	Patient_312
9	Control	7	0	Centre_4	Patient_305
8	Control	3	0	Centre_4	Patient_274
4	Control	3	0	Centre_4	Patient_264
1	Control	2	0	Centre_4	Patient_280
5	Control	3	0	Centre_4	Patient_313
10	Control	6	0	Centre_4	Patient_279
19	Control	5	0	Centre_4	Patient_314
15	Control	8	0	Centre_4	Patient_315
7	Control	9	0	Centre_4	Patient_316
19	Control	4	0	Centre_4	Patient_317
17.1429	Control	8	0	Centre_4	Patient_298
19	Control	8	0	Centre_4	Patient_318
0	Control	1	0	Centre_4	Patient_319
4	Control	6	0	Centre_4	Patient_320
9	Control	3	0	Centre_4	Patient_321
18.8571	Control	3	0	Centre_4	Patient_322
12	Control	4	0	Centre_4	Patient_323
6	Control	6	0	Centre_4	Patient_324
0	Control	1	0	Centre_4	Patient_325
19	Control	1	0	Centre_4	Patient_326
9	Control	6	0	Centre_4	Patient_327
6	Control	6	0	Centre_4	Patient_306
7	Control	3	0	Centre_4	Patient_328
16	Control	6	0	Centre_4	Patient_329
6	Control	2	0	Centre_4	Patient_330
16	Control	2	0	Centre_4	Patient_331
12	Control	8	0	Centre_4	Patient_290
8	Control	6	0	Centre_4	Patient_304
19	Control	1	0	Centre_4	Patient_332
11	Control	4	0	Centre_4	Patient_283
12	Control	5	0	Centre_4	Patient_333
15	Control	9	0	Centre_4	Patient_334
17	Control	4	0	Centre_4	Patient_335
24	Control	3	0	Centre_4	Patient_336
11	Control	3	0	Centre_4	Patient_277
24	Control	1	0	Centre_4	Patient_323
18	Control	9	0	Centre_4	Patient_337
16	Control	3	0	Centre_4	Patient_294
9	Control	9	0	Centre_4	Patient_338
19	Control	4	0	Centre_4	Patient_270
15	Control	7	0	Centre_4	Patient_339
9	Control	1	0	Centre_4	Patient_281
11	Control	9	0	Centre_4	Patient_340
12	Control	8	0	Centre_4	Patient_274
8.4	Control	7	0	Centre_4	Patient_289
17.3333	Control	9	0	Centre_4	Patient_341
3	Control	7	0	Centre_4	Patient_340
19	Control	9	0	Centre_4	Patient_274
11	Control	7	0	Centre_4	Patient_342
4	Control	9	0	Centre_4	Patient_343
11	Control	8	0	Centre_4	Patient_344
9	Control	8	0	Centre_4	Patient_345
15	Control	6	0	Centre_4	Patient_346
34	Control	5	0	Centre_4	Patient_276
10	Control	7	0	Centre_4	Patient_347
14	Control	9	0	Centre_4	Patient_270
11	Control	3	0	Centre_4	Patient_348
3	Control	1	0	Centre_4	Patient_349
3	Control	6	0	Centre_4	Patient_350
9	Control	9	0	Centre_4	Patient_351
5	Control	7	0	Centre_4	Patient_310
6	Control	8	0	Centre_4	Patient_285
10	Control	8	0	Centre_4	Patient_352
12	Control	1	0	Centre_4	Patient_353
18	Control	3	0	Centre_4	Patient_354
31.6364	Control	9	0	Centre_4	Patient_355
36	Control	3	0	Centre_4	Patient_356
22	Control	7	0	Centre_4	Patient_299
5	Control	9	0	Centre_4	Patient_357
9	Control	1	0	Centre_4	Patient_321
14	Control	5	0	Centre_4	Patient_296
12	Control	9	0	Centre_4	Patient_315
17.4545	Control	2	0	Centre_4	Patient_358
17	Control	6	0	Centre_4	Patient_359
18	Control	7	0	Centre_4	Patient_360
8	Control	9	0	Centre_4	Patient_361
20	Control	3	0	Centre_4	Patient_362
11	Control	9	0	Centre_4	Patient_305
11	Control	6	0	Centre_4	Patient_363
10	Control	6	0	Centre_4	Patient_361
21	Control	9	0	Centre_4	Patient_342
7	Control	2	0	Centre_4	Patient_364
1	Control	7	0	Centre_4	Patient_365
5	Control	6	0	Centre_4	Patient_366
3	Control	7	0	Centre_4	Patient_306
6	Control	7	0	Centre_4	Patient_343
12	Control	2	0	Centre_4	Patient_277
16	Control	5	0	Centre_4	Patient_367
19	Control	3	0	Centre_4	Patient_339
3	Control	1	0	Centre_4	Patient_368
8	Control	4	0	Centre_4	Patient_307
14	Control	7	0	Centre_4	Patient_369
20.7273	Control	8	0	Centre_4	Patient_305
4	Control	6	0	Centre_4	Patient_291
16	Control	9	0	Centre_4	Patient_370
15	Control	9	0	Centre_4	Patient_371
12	Control	5	0	Centre_4	Patient_372
5	Control	7	0	Centre_4	Patient_310
8	Control	7	0	Centre_4	Patient_274
7	Control	3	0	Centre_4	Patient_320
11	Control	7	0	Centre_4	Patient_363
7	Control	7	0	Centre_4	Patient_323
10	Control	5	0	Centre_4	Patient_277
8	Control	7	0	Centre_4	Patient_346
36	Control	3	0	Centre_4	Patient_373
15	Control	5	0	Centre_4	Patient_374
0	Control	4	0	Centre_4	Patient_266
6	Control	6	0	Centre_4	Patient_375
13	Control	5	0	Centre_4	Patient_269
15	Control	8	0	Centre_4	Patient_270
7	Control	3	0	Centre_4	Patient_269
11	Control	5	0	Centre_4	Patient_376
21.8182	Control	7	0	Centre_4	Patient_292
19.2	Control	2	0	Centre_4	Patient_277
16	Control	4	0	Centre_4	Patient_377
15	Control	8	0	Centre_4	Patient_321
10	Control	2	0	Centre_4	Patient_378
8	Control	3	0	Centre_4	Patient_379
8	Control	6	0	Centre_4	Patient_380
13	Control	2	0	Centre_4	Patient_280
17	Control	9	0	Centre_4	Patient_372
13	Control	2	0	Centre_4	Patient_320
19	Control	3	0	Centre_4	Patient_381
15	Control	6	0	Centre_4	Patient_274
10	Control	2	0	Centre_4	Patient_382
12	Control	6	0	Centre_4	Patient_383
3	Control	6	0	Centre_4	Patient_384
8	Control	1	0	Centre_4	Patient_280
19	Control	8	0	Centre_4	Patient_385
9	Control	8	0	Centre_4	Patient_345
9	Control	4	0	Centre_4	Patient_386
6	Control	2	0	Centre_4	Patient_290
1	Control	7	0	Centre_4	Patient_285
6	Control	5	0	Centre_4	Patient_387
10	Control	6	0	Centre_4	Patient_361
9	Control	4	0	Centre_4	Patient_336
20	Control	9	0	Centre_4	Patient_335
19	Control	10	0	Centre_4	Patient_388
20.4	Control	9	0	Centre_4	Patient_389
11	Control	5	0	Centre_4	Patient_390
9	Control	2	0	Centre_4	Patient_326
10	Control	7	0	Centre_4	Patient_285
10	Control	1	0	Centre_4	Patient_307
13	Control	6	0	Centre_4	Patient_391
15	Control	6	0	Centre_4	Patient_392
18	Control	7	0	Centre_4	Patient_393
11	Control	6	0	Centre_4	Patient_394
11	Control	1	0	Centre_4	Patient_315
21	Control	6	0	Centre_4	Patient_395
13	Control	5	0	Centre_5	Patient_396
17	Control	2	0	Centre_5	Patient_397
23	Control	2	0	Centre_5	Patient_398
26	Control	2	0	Centre_5	Patient_399
9	Control	3	0	Centre_5	Patient_400
10	Control	1	0	Centre_5	Patient_401
15	Control	2	0	Centre_5	Patient_402
6	Control	1	0	Centre_5	Patient_403
8	Control	5	0	Centre_5	Patient_404
12	Control	1	0	Centre_5	Patient_405
6	Control	1	0	Centre_5	Patient_406
7	Control	5	0	Centre_5	Patient_407
19	Control	3	0	Centre_5	Patient_408
15	Control	1	0	Centre_5	Patient_409
12	Control	1	0	Centre_5	Patient_410
22	Control	3	0	Centre_5	Patient_411
18	Control	6	0	Centre_5	Patient_412
6	Control	1	0	Centre_5	Patient_413
4	Control	4	0	Centre_5	Patient_414
12	Control	5	0	Centre_5	Patient_415
12	Control	1	0	Centre_5	Patient_416
7	Control	4	0	Centre_5	Patient_417
13.2	Control	1	0	Centre_5	Patient_418
3	Control	1	0	Centre_5	Patient_419
15	Control	2	0	Centre_5	Patient_420
2	Control	3	0	Centre_5	Patient_421
13	Control	5	0	Centre_5	Patient_410
6	Control	1	0	Centre_5	Patient_421
13	Control	4	0	Centre_5	Patient_422
11	Control	4	0	Centre_5	Patient_416
7	Control	2	0	Centre_5	Patient_423
15	Control	1	0	Centre_5	Patient_402
3	Control	2	0	Centre_5	Patient_418
14	Control	5	0	Centre_5	Patient_424
2	Control	2	0	Centre_5	Patient_425
2	Control	3	0	Centre_5	Patient_426
21	Control	6	0	Centre_5	Patient_427
12	Control	1	0	Centre_5	Patient_405
19	Control	4	0	Centre_5	Patient_428
7	Control	6	0	Centre_5	Patient_429
14	Control	1	0	Centre_5	Patient_430
8	Control	5	0	Centre_5	Patient_431
20	Control	1	0	Centre_5	Patient_397
14	Control	5	0	Centre_5	Patient_432
18	Control	5	0	Centre_5	Patient_433
4	Control	6	0	Centre_5	Patient_434
2	Control	2	0	Centre_5	Patient_418
18	Control	6	0	Centre_5	Patient_435
10	Control	6	0	Centre_5	Patient_436
10	Control	5	0	Centre_5	Patient_437
10	Control	3	0	Centre_5	Patient_438
2.4	Control	2	0	Centre_5	Patient_439
10.8	Control	1	0	Centre_5	Patient_439
4	Control	4	0	Centre_5	Patient_425
12	Control	2	0	Centre_5	Patient_440
18	Control	4	0	Centre_5	Patient_441
10	Control	1	0	Centre_5	Patient_442
8	Control	3	0	Centre_5	Patient_443
9	Control	11	0	Centre_6	Patient_444
18	Control	9	0	Centre_6	Patient_445
13	Control	5	0	Centre_6	Patient_446
16	Control	2	0	Centre_6	Patient_447
3	Control	4	0	Centre_6	Patient_448
2	Control	5	0	Centre_6	Patient_449
15	Control	5	0	Centre_6	Patient_450
8	Control	11	0	Centre_6	Patient_451
4	Control	7	0	Centre_6	Patient_452
6	Control	1	0	Centre_6	Patient_453
17	Control	9	0	Centre_6	Patient_454
20	Control	7	0	Centre_6	Patient_455
9	Control	3	0	Centre_6	Patient_456
14	Control	5	0	Centre_6	Patient_457
7	Control	1	0	Centre_6	Patient_458
13	Control	1	0	Centre_6	Patient_459
7	Control	10	0	Centre_6	Patient_456
10	Control	5	0	Centre_6	Patient_460
8	Control	3	0	Centre_6	Patient_461
7	Control	2	0	Centre_6	Patient_462
12	Control	2	0	Centre_6	Patient_463
15	Control	3	0	Centre_6	Patient_446
21	Control	10	0	Centre_6	Patient_464
13	Control	8	0	Centre_6	Patient_465
15	Control	11	0	Centre_6	Patient_466
7	Control	4	0	Centre_6	Patient_467
13	Control	8	0	Centre_6	Patient_468
3	Control	11	0	Centre_6	Patient_469
14	Control	4	0	Centre_6	Patient_470
5	Control	4	0	Centre_6	Patient_471
0	Control	11	0	Centre_6	Patient_472
15	Control	4	0	Centre_6	Patient_454
2	Control	1	0	Centre_6	Patient_452
10	Control	3	0	Centre_6	Patient_473
4	Control	7	0	Centre_6	Patient_458
6	Control	6	0	Centre_6	Patient_474
6	Control	1	0	Centre_6	Patient_475
9	Control	6	0	Centre_6	Patient_476
6	Control	11	0	Centre_6	Patient_473
5	Control	10	0	Centre_6	Patient_456
7	Control	9	0	Centre_6	Patient_477
8	Control	6	0	Centre_6	Patient_478
8	Control	5	0	Centre_6	Patient_479
2	Control	6	0	Centre_6	Patient_469
10	Control	3	0	Centre_6	Patient_480
3	Control	4	0	Centre_6	Patient_481
16	Control	9	0	Centre_6	Patient_482
10	Control	8	0	Centre_6	Patient_483
5	Control	9	0	Centre_6	Patient_465
4	Control	5	0	Centre_6	Patient_484
25	Control	2	0	Centre_6	Patient_485
11	Control	10	0	Centre_6	Patient_486
11	Control	4	0	Centre_6	Patient_487
6	Control	7	0	Centre_6	Patient_488
16	Control	3	0	Centre_6	Patient_489
13	Control	9	0	Centre_6	Patient_485
18	Control	10	0	Centre_6	Patient_490
23	Control	6	0	Centre_6	Patient_491
11	Control	11	0	Centre_6	Patient_492
13	Control	10	0	Centre_6	Patient_493
20	Control	9	0	Centre_6	Patient_494
20	Control	10	0	Centre_6	Patient_495
12	Control	7	0	Centre_6	Patient_496
8	Control	2	0	Centre_6	Patient_497
12	Control	6	0	Centre_6	Patient_498
7	Control	6	0	Centre_6	Patient_462
10	Control	9	0	Centre_6	Patient_499
14	Control	7	0	Centre_6	Patient_500
1	Control	1	0	Centre_6	Patient_501
11	Control	5	0	Centre_6	Patient_502
23	Control	9	0	Centre_6	Patient_503
11	Control	10	0	Centre_6	Patient_504
12	Control	9	0	Centre_6	Patient_505
17	Control	1	0	Centre_6	Patient_506
13	Control	10	0	Centre_6	Patient_507
19	Control	8	0	Centre_6	Patient_508
1	Control	10	0	Centre_6	Patient_509
14	Control	4	0	Centre_6	Patient_510
16	Control	10	0	Centre_6	Patient_511
7	Control	7	0	Centre_6	Patient_512
0	Control	11	0	Centre_6	Patient_513
9	Control	7	0	Centre_6	Patient_497
9	Control	4	0	Centre_6	Patient_514
7.63636	Control	7	0	Centre_6	Patient_466
7	Control	11	0	Centre_6	Patient_515
14	Control	10	0	Centre_6	Patient_516
14	Control	3	0	Centre_6	Patient_517
6.54545	Control	3	0	Centre_6	Patient_476
3	Control	10	0	Centre_6	Patient_460
9	Control	10	0	Centre_6	Patient_480
13	Control	4	0	Centre_6	Patient_518
14	Control	11	0	Centre_6	Patient_519
5	Control	3	0	Centre_6	Patient_458
5	Control	6	0	Centre_6	Patient_520
17	Control	1	0	Centre_6	Patient_458
13	Control	2	0	Centre_6	Patient_521
15	Control	11	0	Centre_6	Patient_522
18	Control	4	0	Centre_6	Patient_523
4	Control	12	0	Centre_6	Patient_479
11	Control	8	0	Centre_6	Patient_521
10	Control	9	0	Centre_6	Patient_524
10	Control	11	0	Centre_6	Patient_525
16	Control	9	0	Centre_6	Patient_526
13	Control	7	0	Centre_6	Patient_527
8	Control	2	0	Centre_6	Patient_528
14	Control	1	0	Centre_6	Patient_480
6	Control	9	0	Centre_6	Patient_529
5	Control	2	0	Centre_6	Patient_530
10.6667	Control	8	0	Centre_6	Patient_456
20	Control	9	0	Centre_6	Patient_531
8	Control	11	0	Centre_6	Patient_532
26.1818	Control	10	0	Centre_6	Patient_533
19	Control	10	0	Centre_6	Patient_474
12	Control	6	0	Centre_6	Patient_534
11	Control	3	0	Centre_6	Patient_535
9	Control	1	0	Centre_6	Patient_451
7	Control	11	0	Centre_6	Patient_536
14.6667	Control	7	0	Centre_6	Patient_537
7	Control	10	0	Centre_6	Patient_538
12	Control	9	0	Centre_6	Patient_465
0	Control	4	0	Centre_6	Patient_509
12	Control	4	0	Centre_6	Patient_539
10	Control	11	0	Centre_6	Patient_540
11	Control	6	0	Centre_6	Patient_541
24	Control	2	0	Centre_6	Patient_542
2	Control	7	0	Centre_6	Patient_543
0	Control	9	0	Centre_6	Patient_537
11	Control	5	0	Centre_6	Patient_519
22	Control	3	0	Centre_6	Patient_544
6	Control	8	0	Centre_6	Patient_463
13	Control	1	0	Centre_6	Patient_486
0	Control	5	0	Centre_6	Patient_472
8	Control	6	0	Centre_6	Patient_446
13	Control	11	0	Centre_6	Patient_510
12	Control	9	0	Centre_6	Patient_465
7	Control	4	0	Centre_6	Patient_545
18	Control	6	0	Centre_6	Patient_546
26	Control	10	0	Centre_6	Patient_450
24	Control	5	0	Centre_6	Patient_499
19	Control	2	0	Centre_6	Patient_542
13	Control	9	0	Centre_6	Patient_547
14	Control	2	0	Centre_6	Patient_548
14	Control	2	0	Centre_6	Patient_549
9	Control	11	0	Centre_6	Patient_550
22	Control	1	0	Centre_6	Patient_551
14	Control	5	0	Centre_6	Patient_446
10	Control	6	0	Centre_6	Patient_446
21	Control	7	0	Centre_6	Patient_552
5	Control	4	0	Centre_6	Patient_553
6	Control	10	0	Centre_6	Patient_530
3	Control	9	0	Centre_6	Patient_554
13	Control	6	0	Centre_6	Patient_474
9	Control	9	0	Centre_6	Patient_514
12	Control	6	0	Centre_6	Patient_444
21	Control	2	0	Centre_6	Patient_464
4	Control	9	0	Centre_6	Patient_555
11	Control	9	0	Centre_6	Patient_556
4	Control	11	0	Centre_6	Patient_557
11	Control	5	0	Centre_6	Patient_558
1	Control	5	0	Centre_6	Patient_513
10	Control	10	0	Centre_6	Patient_473
12	Control	8	0	Centre_6	Patient_549
13.7143	Control	11	0	Centre_6	Patient_533
5	Control	11	0	Centre_6	Patient_511
13	Control	10	0	Centre_6	Patient_468
4	Control	11	0	Centre_6	Patient_481
4	Control	7	0	Centre_6	Patient_559
26	Control	10	0	Centre_6	Patient_532
4	Control	11	0	Centre_6	Patient_560
7	Control	11	0	Centre_6	Patient_561
18	Control	6	0	Centre_6	Patient_484
7	Control	1	0	Centre_6	Patient_562
12	Control	1	0	Centre_6	Patient_483
5	Control	3	0	Centre_6	Patient_563
17	Control	6	0	Centre_6	Patient_517
9	Control	2	0	Centre_6	Patient_564
20	Control	9	0	Centre_6	Patient_565
15	Control	2	0	Centre_6	Patient_566
10	Control	2	0	Centre_6	Patient_458
6	Control	11	0	Centre_6	Patient_487
2	Control	8	0	Centre_6	Patient_567
13	Control	5	0	Centre_6	Patient_450
4	Control	5	0	Centre_6	Patient_466
25	Control	11	0	Centre_6	Patient_450
10	Control	9	0	Centre_6	Patient_528
24	Control	9	0	Centre_6	Patient_568
7	Control	9	0	Centre_6	Patient_548
15	Control	6	0	Centre_6	Patient_484
17	Control	9	0	Centre_6	Patient_535
10	Control	7	0	Centre_6	Patient_569
8	Control	5	0	Centre_6	Patient_570
12	Control	7	0	Centre_6	Patient_571
8	Control	9	0	Centre_6	Patient_541
19	Control	4	0	Centre_6	Patient_465
12	Control	1	0	Centre_6	Patient_571
8	Control	2	0	Centre_6	Patient_570
4	Control	1	0	Centre_6	Patient_572
9	Control	1	0	Centre_6	Patient_573
19	Control	11	0	Centre_6	Patient_532
5	Control	10	0	Centre_6	Patient_574
7	Control	11	0	Centre_6	Patient_575
7	Control	1	0	Centre_6	Patient_520
17	Control	8	0	Centre_6	Patient_551
15	Control	11	0	Centre_6	Patient_466
16	Control	9	0	Centre_6	Patient_532
19	Control	2	0	Centre_6	Patient_468
5	Control	4	0	Centre_6	Patient_458
12	Control	4	0	Centre_6	Patient_465
8	Control	9	0	Centre_6	Patient_471
17	Control	5	0	Centre_6	Patient_576
5	Control	7	0	Centre_6	Patient_501
20	Control	12	0	Centre_6	Patient_577
2	Control	8	0	Centre_6	Patient_465
10	Control	5	0	Centre_6	Patient_473
9	Control	6	0	Centre_6	Patient_550
4	Control	9	0	Centre_6	Patient_537
19	Control	8	0	Centre_6	Patient_508
14	Control	5	0	Centre_6	Patient_578
19	Control	2	0	Centre_6	Patient_505
9	Control	8	0	Centre_6	Patient_474
17	Control	7	0	Centre_6	Patient_506
17	Control	7	0	Centre_6	Patient_537
9	Control	7	0	Centre_6	Patient_563
9	Control	8	0	Centre_6	Patient_484
10	Control	9	0	Centre_6	Patient_484
4	Control	3	0	Centre_6	Patient_555
22	Control	6	0	Centre_6	Patient_517
5	Control	7	0	Centre_6	Patient_579
10	Control	8	0	Centre_6	Patient_484
17.4545	Control	6	0	Centre_6	Patient_580
15	Control	7	0	Centre_6	Patient_453
5	Control	9	0	Centre_6	Patient_474
4	Control	7	0	Centre_6	Patient_572
13	Control	11	0	Centre_6	Patient_569
11	Control	1	0	Centre_6	Patient_581
8	Control	10	0	Centre_6	Patient_512
8	Control	4	0	Centre_6	Patient_557
9	Control	4	0	Centre_6	Patient_525
13	Control	8	0	Centre_6	Patient_582
16	Control	3	0	Centre_6	Patient_465
16	Control	2	0	Centre_6	Patient_583
25	Control	1	0	Centre_6	Patient_584
9	Control	4	0	Centre_6	Patient_497
15	Control	10	0	Centre_6	Patient_585
9	Control	5	0	Centre_6	Patient_586
20	Control	11	0	Centre_6	Patient_523
8	Control	1	0	Centre_6	Patient_547
16	Control	2	0	Centre_6	Patient_482
6	Control	2	0	Centre_6	Patient_458
9	Control	11	0	Centre_6	Patient_584
30	Control	11	0	Centre_6	Patient_577
7	Control	8	0	Centre_6	Patient_451
14	Control	11	0	Centre_6	Patient_582
6	Control	9	0	Centre_6	Patient_455
2.18182	Control	3	0	Centre_6	Patient_587
10	Control	8	0	Centre_6	Patient_474
12	Control	1	0	Centre_6	Patient_527
10	Control	3	0	Centre_6	Patient_476
27	Control	5	0	Centre_6	Patient_499
16	Control	10	0	Centre_6	Patient_588
15	Control	8	0	Centre_6	Patient_589
11	Control	2	0	Centre_6	Patient_483
17.3333	Control	4	0	Centre_6	Patient_498
10	Control	10	0	Centre_6	Patient_447
13	Control	10	0	Centre_6	Patient_563
3	Control	10	0	Centre_6	Patient_553
32	Control	6	0	Centre_6	Patient_590
4	Control	10	0	Centre_6	Patient_545
1	Control	8	0	Centre_6	Patient_538
8	Control	9	0	Centre_6	Patient_458
10	Control	10	0	Centre_6	Patient_591
20	Control	4	0	Centre_6	Patient_495
9	Control	5	0	Centre_6	Patient_592
5	Control	8	0	Centre_6	Patient_564
16	Control	4	0	Centre_6	Patient_593
3	Control	1	0	Centre_6	Patient_582
4	Control	9	0	Centre_6	Patient_465
4	Control	11	0	Centre_6	Patient_511
9	Control	1	0	Centre_6	Patient_594
5	Control	1	0	Centre_6	Patient_460
13	Control	3	0	Centre_6	Patient_516
10	Control	9	0	Centre_6	Patient_595
14	Control	8	0	Centre_6	Patient_465
9	Control	7	0	Centre_6	Patient_475
4	Control	8	0	Centre_6	Patient_596
5	Control	4	0	Centre_6	Patient_540
18	Control	5	0	Centre_6	Patient_523
26	Control	5	0	Centre_6	Patient_597
36	Control	11	0	Centre_6	Patient_590
11	Control	5	0	Centre_6	Patient_477
19	Control	6	0	Centre_6	Patient_499
11	Control	9	0	Centre_6	Patient_459
8	Control	4	0	Centre_6	Patient_596
6	Control	7	0	Centre_6	Patient_529
15	Control	6	0	Centre_6	Patient_598
17	Control	10	0	Centre_6	Patient_599
3	Control	10	0	Centre_6	Patient_460
1	Control	1	0	Centre_6	Patient_600
17	Control	5	0	Centre_6	Patient_584
15	Control	4	0	Centre_6	Patient_542
13	Control	7	0	Centre_6	Patient_497
11	Control	10	0	Centre_6	Patient_601
2	Control	6	0	Centre_6	Patient_600
9	Control	2	0	Centre_6	Patient_476
25.5	Control	4	0	Centre_6	Patient_498
19	Control	2	0	Centre_6	Patient_556
6	Control	5	0	Centre_6	Patient_602
5	Control	6	0	Centre_6	Patient_603
9	Control	7	0	Centre_6	Patient_604
6	Control	10	0	Centre_6	Patient_450
6	Control	11	0	Centre_6	Patient_605
10	Control	8	0	Centre_6	Patient_446
21	Control	9	0	Centre_6	Patient_606
6	Control	6	0	Centre_6	Patient_570
8	Control	11	0	Centre_6	Patient_602
7	Control	4	0	Centre_6	Patient_533
14	Control	3	0	Centre_6	Patient_524
8	Control	8	0	Centre_6	Patient_531
1	Control	11	0	Centre_6	Patient_449
12	Control	11	0	Centre_6	Patient_466
12	Control	4	0	Centre_6	Patient_607
26	Control	11	0	Centre_6	Patient_608
10	Control	4	0	Centre_6	Patient_561
10	Control	9	0	Centre_6	Patient_582
12	Control	11	0	Centre_7	Patient_609
21	Control	4	0	Centre_7	Patient_610
1	Control	9	0	Centre_7	Patient_611
18	Control	7	0	Centre_7	Patient_612
8	Control	11	0	Centre_7	Patient_613
5	Control	10	0	Centre_7	Patient_614
6	Control	10	0	Centre_7	Patient_615
27	Control	7	0	Centre_7	Patient_616
23	Control	5	0	Centre_7	Patient_617
13	Control	7	0	Centre_7	Patient_618
13	Control	9	0	Centre_7	Patient_619
6	Control	1	0	Centre_7	Patient_620
15	Control	8	0	Centre_7	Patient_621
3	Control	7	0	Centre_7	Patient_622
26	Control	11	0	Centre_7	Patient_623
29	Control	8	0	Centre_7	Patient_624
18	Control	9	0	Centre_7	Patient_625
14	Control	7	0	Centre_7	Patient_626
18	Control	8	0	Centre_7	Patient_627
6	Control	7	0	Centre_7	Patient_628
13	Control	5	0	Centre_7	Patient_629
22	Control	2	0	Centre_7	Patient_630
19	Control	6	0	Centre_7	Patient_631
15	Control	10	0	Centre_7	Patient_632
5	Control	8	0	Centre_7	Patient_633
16	Control	7	0	Centre_7	Patient_634
16.3636	Control	4	0	Centre_7	Patient_635
20	Control	8	0	Centre_7	Patient_636
7	Control	8	0	Centre_7	Patient_637
16.5	Control	10	0	Centre_7	Patient_638
22	Control	9	0	Centre_7	Patient_639
8	Control	7	0	Centre_7	Patient_640
20	Control	9	0	Centre_7	Patient_641
6	Control	9	0	Centre_7	Patient_642
11	Control	8	0	Centre_7	Patient_643
8	Control	3	0	Centre_7	Patient_644
7	Control	10	0	Centre_7	Patient_620
6	Control	6	0	Centre_7	Patient_645
28	Control	10	0	Centre_7	Patient_646
26	Control	11	0	Centre_7	Patient_647
33	Control	7	0	Centre_7	Patient_648
18	Control	3	0	Centre_7	Patient_649
13	Control	9	0	Centre_7	Patient_650
20	Control	8	0	Centre_7	Patient_651
10	Control	10	0	Centre_7	Patient_652
14	Control	5	0	Centre_7	Patient_653
9	Control	10	0	Centre_7	Patient_650
12	Control	6	0	Centre_7	Patient_654
10	Control	11	0	Centre_7	Patient_655
6	Control	11	0	Centre_7	Patient_656
19	Control	2	0	Centre_7	Patient_657
18	Control	2	0	Centre_7	Patient_653
0	Control	11	0	Centre_7	Patient_658
24	Control	5	0	Centre_7	Patient_659
18	Control	4	0	Centre_7	Patient_614
17	Control	10	0	Centre_7	Patient_653
16	Control	1	0	Centre_7	Patient_653
1	Control	4	0	Centre_7	Patient_660
4	Control	4	0	Centre_7	Patient_649
9	Control	8	0	Centre_7	Patient_623
5	Control	11	0	Centre_7	Patient_661
16	Control	7	0	Centre_7	Patient_662
24	Control	5	0	Centre_7	Patient_663
20	Control	8	0	Centre_7	Patient_664
20	Control	8	0	Centre_7	Patient_665
12	Control	8	0	Centre_7	Patient_666
11	Control	8	0	Centre_7	Patient_667
5	Control	9	0	Centre_7	Patient_668
9	Control	3	0	Centre_7	Patient_669
16	Control	4	0	Centre_7	Patient_619
19	Control	2	0	Centre_7	Patient_654
10	Control	11	0	Centre_7	Patient_670
36	Control	1	0	Centre_7	Patient_667
1	Control	2	0	Centre_7	Patient_611
7	Control	10	0	Centre_7	Patient_671
20	Control	5	0	Centre_7	Patient_672
13	Control	7	0	Centre_7	Patient_673
18	Control	1	0	Centre_7	Patient_674
20	Control	5	0	Centre_7	Patient_675
1	Control	10	0	Centre_7	Patient_660
18	Control	10	0	Centre_7	Patient_676
21.8182	Control	8	0	Centre_7	Patient_677
20	Control	7	0	Centre_7	Patient_678
13	Control	4	0	Centre_7	Patient_679
3	Control	9	0	Centre_7	Patient_680
18.5455	Control	11	0	Centre_7	Patient_681
3	Control	9	0	Centre_7	Patient_682
12	Control	10	0	Centre_7	Patient_683
21	Control	8	0	Centre_7	Patient_684
6	Control	1	0	Centre_7	Patient_628
18	Control	6	0	Centre_7	Patient_685
37	Control	6	0	Centre_7	Patient_686
24	Control	7	0	Centre_7	Patient_687
22	Control	9	0	Centre_7	Patient_688
4	Control	2	0	Centre_7	Patient_689
19	Control	9	0	Centre_7	Patient_690
17	Control	3	0	Centre_7	Patient_691
4	Control	11	0	Centre_7	Patient_692
0	Control	9	0	Centre_7	Patient_693
9	Control	10	0	Centre_7	Patient_674
28	Control	7	0	Centre_7	Patient_694
6	Control	2	0	Centre_7	Patient_680
25	Control	8	0	Centre_7	Patient_695
5	Control	8	0	Centre_7	Patient_696
2	Control	1	0	Centre_7	Patient_670
13	Control	8	0	Centre_7	Patient_697
28	Control	10	0	Centre_7	Patient_659
20	Control	6	0	Centre_7	Patient_698
14	Control	7	0	Centre_7	Patient_675
22	Control	8	0	Centre_7	Patient_638
22	Control	9	0	Centre_7	Patient_699
9	Control	8	0	Centre_7	Patient_700
0	Control	2	0	Centre_7	Patient_701
2	Control	2	0	Centre_7	Patient_702
17	Control	2	0	Centre_7	Patient_632
14	Control	7	0	Centre_7	Patient_703
13.0909	Control	9	0	Centre_7	Patient_704
14	Control	11	0	Centre_7	Patient_705
22	Control	8	0	Centre_7	Patient_706
4	Control	4	0	Centre_7	Patient_707
18	Control	10	0	Centre_7	Patient_700
7	Control	1	0	Centre_7	Patient_708
3	Control	9	0	Centre_7	Patient_689
18	Control	6	0	Centre_7	Patient_709
10	Control	5	0	Centre_7	Patient_710
22	Control	5	0	Centre_7	Patient_711
17	Control	8	0	Centre_7	Patient_700
15	Control	9	0	Centre_7	Patient_712
30	Control	8	0	Centre_7	Patient_713
23	Control	8	0	Centre_7	Patient_714
17	Control	3	0	Centre_7	Patient_676
9	Control	6	0	Centre_7	Patient_649
14	Control	4	0	Centre_7	Patient_715
16	Control	10	0	Centre_7	Patient_716
0	Control	10	0	Centre_7	Patient_701
6	Control	9	0	Centre_7	Patient_717
18	Control	5	0	Centre_7	Patient_685
8	Control	7	0	Centre_7	Patient_609
20	Control	5	0	Centre_7	Patient_609
16	Control	9	0	Centre_7	Patient_718
19	Control	6	0	Centre_7	Patient_685
22	Control	9	0	Centre_7	Patient_719
15	Control	5	0	Centre_7	Patient_685
23	Control	10	0	Centre_7	Patient_720
3	Control	9	0	Centre_7	Patient_721
9	Control	9	0	Centre_7	Patient_708
0	Control	9	0	Centre_7	Patient_722
9	Control	2	0	Centre_7	Patient_723
7	Control	9	0	Centre_7	Patient_724
1	Control	11	0	Centre_7	Patient_696
24	Control	8	0	Centre_7	Patient_686
9	Control	4	0	Centre_7	Patient_725
8	Control	1	0	Centre_7	Patient_726
13	Control	10	0	Centre_7	Patient_727
27	Control	5	0	Centre_7	Patient_728
6	Control	5	0	Centre_7	Patient_615
12	Control	8	0	Centre_7	Patient_729
18	Control	1	0	Centre_7	Patient_730
9	Control	9	0	Centre_7	Patient_731
2	Control	8	0	Centre_7	Patient_693
10.9091	Control	10	0	Centre_7	Patient_658
24	Control	9	0	Centre_7	Patient_732
16	Control	10	0	Centre_7	Patient_733
16	Control	8	0	Centre_7	Patient_673
18.5455	Control	9	0	Centre_7	Patient_609
22	Control	8	0	Centre_7	Patient_734
17.4545	Control	4	0	Centre_7	Patient_629
12	Control	10	0	Centre_7	Patient_735
14	Control	9	0	Centre_7	Patient_722
12	Control	2	0	Centre_7	Patient_691
26	Control	2	0	Centre_7	Patient_704
26	Control	2	0	Centre_7	Patient_646
8	Control	7	0	Centre_7	Patient_736
22	Control	7	0	Centre_7	Patient_737
16	Control	5	0	Centre_7	Patient_692
16.8	Control	8	0	Centre_7	Patient_685
29.4545	Control	7	0	Centre_7	Patient_738
9	Control	10	0	Centre_7	Patient_739
15	Control	11	0	Centre_7	Patient_740
22	Control	7	0	Centre_7	Patient_630
22	Control	2	0	Centre_7	Patient_630
17	Control	8	0	Centre_7	Patient_657
20	Control	9	0	Centre_7	Patient_741
8	Control	4	0	Centre_7	Patient_652
24	Control	8	0	Centre_7	Patient_742
16	Control	9	0	Centre_7	Patient_679
25	Control	8	0	Centre_7	Patient_743
18	Control	10	0	Centre_7	Patient_744
23	Control	7	0	Centre_7	Patient_745
5	Control	4	0	Centre_7	Patient_723
13	Control	4	0	Centre_7	Patient_746
24	Control	7	0	Centre_7	Patient_747
19	Control	7	0	Centre_7	Patient_748
0	Control	7	0	Centre_7	Patient_749
13	Control	11	0	Centre_7	Patient_750
6	Control	8	0	Centre_7	Patient_751
4	Control	4	0	Centre_7	Patient_752
18	Control	3	0	Centre_7	Patient_753
1	Control	2	0	Centre_7	Patient_682
19	Control	2	0	Centre_7	Patient_754
15	Control	9	0	Centre_7	Patient_753
14	Control	1	0	Centre_7	Patient_670
10	Control	8	0	Centre_7	Patient_667
20	Control	8	0	Centre_7	Patient_755
14	Control	10	0	Centre_7	Patient_629
15	Control	3	0	Centre_7	Patient_670
17	Control	1	0	Centre_7	Patient_653
0	Control	2	0	Centre_7	Patient_756
8	Control	5	0	Centre_7	Patient_613
23	Control	9	0	Centre_7	Patient_757
21	Control	5	0	Centre_7	Patient_685
6	Control	7	0	Centre_7	Patient_666
17	Control	4	0	Centre_7	Patient_674
22.9091	Control	4	0	Centre_7	Patient_629
22	Control	7	0	Centre_7	Patient_650
22	Control	4	0	Centre_7	Patient_758
25	Control	8	0	Centre_7	Patient_759
10	Control	10	0	Centre_7	Patient_760
10	Control	8	0	Centre_7	Patient_761
7	Control	5	0	Centre_7	Patient_731
16	Control	8	0	Centre_7	Patient_730
10	Control	1	0	Centre_7	Patient_762
0	Control	9	0	Centre_7	Patient_763
18	Control	10	0	Centre_7	Patient_764
28.8	Control	10	0	Centre_7	Patient_694
14	Control	2	0	Centre_7	Patient_679
13	Control	4	0	Centre_7	Patient_765
9	Control	8	0	Centre_7	Patient_766
12	Control	9	0	Centre_7	Patient_767
6	Control	7	0	Centre_7	Patient_756
20	Control	10	0	Centre_7	Patient_742
26	Control	3	0	Centre_7	Patient_688
14	Control	10	0	Centre_7	Patient_730
2	Control	9	0	Centre_7	Patient_768
26	Control	5	0	Centre_7	Patient_769
7	Control	9	0	Centre_7	Patient_770
23	Control	9	0	Centre_7	Patient_632
11	Control	10	0	Centre_7	Patient_771
22	Control	10	0	Centre_7	Patient_772
10	Control	10	0	Centre_7	Patient_773
8	Control	9	0	Centre_7	Patient_774
10	Control	2	0	Centre_7	Patient_775
5	Control	6	0	Centre_7	Patient_774
8	Control	2	0	Centre_7	Patient_756
20	Control	10	0	Centre_7	Patient_776
17	Control	5	0	Centre_7	Patient_777
11	Control	9	0	Centre_8	Patient_778
14	Control	9	0	Centre_8	Patient_779
7	Control	7	0	Centre_8	Patient_780
21.6	Control	8	0	Centre_8	Patient_781
11	Control	5	0	Centre_8	Patient_782
14	Control	8	0	Centre_8	Patient_783
22.8	Control	8	0	Centre_8	Patient_784
9	Control	5	0	Centre_8	Patient_785
4	Control	8	0	Centre_8	Patient_786
3	Control	9	0	Centre_8	Patient_787
15	Control	4	0	Centre_8	Patient_788
15	Control	9	0	Centre_8	Patient_789
10	Control	10	0	Centre_8	Patient_790
11	Control	9	0	Centre_8	Patient_791
13	Control	6	0	Centre_8	Patient_792
9	Control	9	0	Centre_8	Patient_793
13	Control	2	0	Centre_8	Patient_794
27	Control	1	0	Centre_8	Patient_795
17	Control	6	0	Centre_8	Patient_796
6	Control	9	0	Centre_8	Patient_797
8	Control	2	0	Centre_8	Patient_798
16	Control	7	0	Centre_8	Patient_799
30	Control	4	0	Centre_8	Patient_800
9	Control	2	0	Centre_8	Patient_801
16	Control	5	0	Centre_8	Patient_802
22	Control	6	0	Centre_8	Patient_803
10	Control	4	0	Centre_8	Patient_804
12	Control	10	0	Centre_8	Patient_805
12	Control	5	0	Centre_8	Patient_806
25	Control	8	0	Centre_8	Patient_807
16.3636	Control	9	0	Centre_8	Patient_808
3	Control	7	0	Centre_8	Patient_809
20	Control	3	0	Centre_8	Patient_810
21	Control	3	0	Centre_8	Patient_811
15.2727	Control	6	0	Centre_8	Patient_812
26	Control	5	0	Centre_8	Patient_813
14	Control	9	0	Centre_8	Patient_814
14.1818	Control	2	0	Centre_8	Patient_815
19	Control	8	0	Centre_8	Patient_816
21.8182	Control	3	0	Centre_8	Patient_817
14	Control	9	0	Centre_8	Patient_818
11	Control	5	0	Centre_8	Patient_819
12	Control	7	0	Centre_8	Patient_820
11	Control	2	0	Centre_8	Patient_821
25.2	Control	3	0	Centre_8	Patient_822
25	Control	7	0	Centre_8	Patient_823
17	Control	2	0	Centre_8	Patient_809
17	Control	5	0	Centre_8	Patient_824
30	Control	7	0	Centre_8	Patient_825
18	Control	8	0	Centre_8	Patient_779
21	Control	4	0	Centre_8	Patient_826
17.3333	Control	8	0	Centre_8	Patient_826
9	Control	9	0	Centre_8	Patient_827
9	Control	4	0	Centre_8	Patient_820
7	Control	8	0	Centre_8	Patient_828
16	Control	9	0	Centre_8	Patient_829
14.1818	Control	1	0	Centre_8	Patient_830
26	Control	2	0	Centre_8	Patient_831
19	Control	9	0	Centre_8	Patient_832
9	Control	10	0	Centre_8	Patient_833
21	Control	5	0	Centre_8	Patient_826
14	Control	5	0	Centre_8	Patient_834
12	Control	10	0	Centre_8	Patient_785
21	Control	5	0	Centre_8	Patient_835
8	Control	10	0	Centre_8	Patient_836
25	Control	3	0	Centre_8	Patient_837
20	Control	8	0	Centre_8	Patient_803
15	Control	10	0	Centre_8	Patient_814
3	Control	10	0	Centre_8	Patient_838
16	Control	4	0	Centre_8	Patient_839
21.8182	Control	10	0	Centre_8	Patient_840
18	Control	8	0	Centre_8	Patient_841
14.4	Control	9	0	Centre_8	Patient_842
24	Control	9	0	Centre_8	Patient_843
16	Control	7	0	Centre_8	Patient_844
12	Control	5	0	Centre_8	Patient_845
25	Control	2	0	Centre_8	Patient_846
27	Control	3	0	Centre_8	Patient_847
7.63636	Control	2	0	Centre_8	Patient_832
9	Control	1	0	Centre_8	Patient_802
17	Control	2	0	Centre_8	Patient_848
14	Control	7	0	Centre_8	Patient_849
14	Control	9	0	Centre_8	Patient_850
22	Control	4	0	Centre_8	Patient_835
26	Control	7	0	Centre_8	Patient_835
8	Control	9	0	Centre_8	Patient_851
17	Control	9	0	Centre_8	Patient_852
9	Control	7	0	Centre_8	Patient_853
10	Control	3	0	Centre_8	Patient_819
8	Control	9	0	Centre_8	Patient_854
21	Control	2	0	Centre_8	Patient_855
13	Control	9	0	Centre_8	Patient_856
12	Control	8	0	Centre_8	Patient_857
15	Control	6	0	Centre_8	Patient_812
19	Control	3	0	Centre_8	Patient_850
36	Control	1	0	Centre_8	Patient_858
19	Control	4	0	Centre_8	Patient_822
20	Control	9	0	Centre_8	Patient_859
13	Control	5	0	Centre_8	Patient_860
15	Control	8	0	Centre_8	Patient_861
18	Control	7	0	Centre_8	Patient_862
2	Control	8	0	Centre_8	Patient_832
13	Control	3	0	Centre_8	Patient_863
14	Control	4	0	Centre_8	Patient_820
12	Control	4	0	Centre_8	Patient_820
10	Control	7	0	Centre_8	Patient_864
10.9091	Control	9	0	Centre_8	Patient_865
17	Control	8	0	Centre_8	Patient_866
12	Control	3	0	Centre_8	Patient_867
28	Control	7	0	Centre_8	Patient_841
21	Control	2	0	Centre_8	Patient_868
1	Control	2	0	Centre_8	Patient_869
18	Control	2	0	Centre_8	Patient_870
23	Control	5	0	Centre_8	Patient_871
20	Control	8	0	Centre_8	Patient_800
8	Control	9	0	Centre_8	Patient_872
18	Control	2	0	Centre_8	Patient_873
22	Control	5	0	Centre_8	Patient_782
13	Control	9	0	Centre_8	Patient_874
16	Control	6	0	Centre_8	Patient_875
13	Control	2	0	Centre_8	Patient_876
0	Control	9	0	Centre_8	Patient_877
7	Control	4	0	Centre_8	Patient_878
19	Control	5	0	Centre_8	Patient_879
16	Control	1	0	Centre_8	Patient_880
18.6667	Control	1	0	Centre_8	Patient_881
20	Control	7	0	Centre_8	Patient_821
8	Control	1	0	Centre_8	Patient_882
12	Control	7	0	Centre_8	Patient_883
5	Control	5	0	Centre_8	Patient_884
14	Control	7	0	Centre_8	Patient_778
4	Control	5	0	Centre_8	Patient_885
14	Control	9	0	Centre_8	Patient_886
21	Control	9	0	Centre_8	Patient_887
13	Control	3	0	Centre_8	Patient_888
20.7273	Control	10	0	Centre_8	Patient_808
0	Control	9	0	Centre_8	Patient_889
16	Control	4	0	Centre_8	Patient_890
16	Control	10	0	Centre_8	Patient_814
18	Control	1	0	Centre_8	Patient_876
14.1818	Control	8	0	Centre_8	Patient_891
23	Control	10	0	Centre_8	Patient_781
14	Control	10	0	Centre_8	Patient_847
20.7273	Control	2	0	Centre_8	Patient_857
4	Control	7	0	Centre_8	Patient_892
5	Control	5	0	Centre_8	Patient_893
24	Control	9	0	Centre_8	Patient_894
14	Control	1	0	Centre_8	Patient_895
3	Control	7	0	Centre_8	Patient_896
18	Control	10	0	Centre_8	Patient_824
13	Control	9	0	Centre_8	Patient_880
17	Control	10	0	Centre_8	Patient_897
6	Control	9	0	Centre_8	Patient_898
20	Control	5	0	Centre_8	Patient_899
10	Control	6	0	Centre_8	Patient_900
13	Control	8	0	Centre_8	Patient_901
20	Control	8	0	Centre_8	Patient_902
12	Control	10	0	Centre_8	Patient_903
15	Control	8	0	Centre_8	Patient_785
17	Control	3	0	Centre_8	Patient_904
13	Control	2	0	Centre_8	Patient_905
19	Control	7	0	Centre_8	Patient_905
16	Control	8	0	Centre_8	Patient_830
10	Control	6	0	Centre_8	Patient_906
8	Control	2	0	Centre_8	Patient_907
7	Control	9	0	Centre_8	Patient_908
10	Control	8	0	Centre_8	Patient_909
29	Control	1	0	Centre_8	Patient_910
14.4	Control	5	0	Centre_8	Patient_911
5	Control	3	0	Centre_8	Patient_835
19	Control	5	0	Centre_8	Patient_825
11	Control	7	0	Centre_8	Patient_900
6	Control	1	0	Centre_8	Patient_912
10	Control	3	0	Centre_8	Patient_813
9	Control	7	0	Centre_8	Patient_835
9	Control	7	0	Centre_8	Patient_861
12	Control	3	0	Centre_8	Patient_888
5	Control	9	0	Centre_8	Patient_805
8	Control	1	0	Centre_8	Patient_913
10	Control	9	0	Centre_8	Patient_914
0	Control	2	0	Centre_8	Patient_915
16	Control	7	0	Centre_8	Patient_905
8	Control	9	0	Centre_8	Patient_916
5	Control	4	0	Centre_8	Patient_917
26	Control	1	0	Centre_8	Patient_858
16	Control	10	0	Centre_8	Patient_918
18	Control	9	0	Centre_8	Patient_919
10.9091	Control	2	0	Centre_8	Patient_791
19.5	Control	8	0	Centre_8	Patient_784
11	Control	4	0	Centre_8	Patient_920
5	Control	9	0	Centre_8	Patient_912
19	Control	8	0	Centre_8	Patient_881
9	Control	4	0	Centre_8	Patient_921
10	Control	8	0	Centre_8	Patient_922
28	Control	3	0	Centre_8	Patient_894
12	Control	6	0	Centre_8	Patient_873
12	Control	4	0	Centre_8	Patient_923
18	Control	4	0	Centre_8	Patient_894
14	Control	10	0	Centre_8	Patient_924
24	Control	9	0	Centre_8	Patient_787
5	Control	9	0	Centre_8	Patient_925
10	Control	10	0	Centre_8	Patient_812
8.72727	Control	2	0	Centre_8	Patient_926
13	Control	10	0	Centre_8	Patient_927
1	Control	8	0	Centre_8	Patient_928
13	Control	7	0	Centre_8	Patient_924
2	Control	3	0	Centre_8	Patient_832
11	Control	2	0	Centre_8	Patient_784
18	Control	3	0	Centre_8	Patient_929
21	Control	9	0	Centre_8	Patient_930
13	Control	4	0	Centre_8	Patient_802
15	Control	8	0	Centre_8	Patient_931
18	Control	9	0	Centre_8	Patient_826
21	Control	8	0	Centre_8	Patient_932
16	Control	8	0	Centre_8	Patient_933
24	Control	10	0	Centre_8	Patient_812
7	Control	8	0	Centre_8	Patient_804
10	Control	10	0	Centre_8	Patient_934
7	Control	3	0	Centre_8	Patient_797
20	Control	1	0	Centre_8	Patient_802
12	Control	4	0	Centre_8	Patient_832
13	Control	10	0	Centre_8	Patient_935
7	Control	7	0	Centre_8	Patient_936
10	Control	5	0	Centre_8	Patient_835
14	Control	5	0	Centre_8	Patient_937
20	Control	6	0	Centre_8	Patient_810
24	Control	9	0	Centre_8	Patient_938
0	Control	7	0	Centre_8	Patient_939
18	Control	2	0	Centre_8	Patient_940
7	Control	5	0	Centre_8	Patient_941
24	Control	3	0	Centre_8	Patient_942
21	Control	4	0	Centre_8	Patient_943
4	Control	8	0	Centre_8	Patient_944
26.1818	Control	10	0	Centre_8	Patient_945
13.0909	Control	2	0	Centre_8	Patient_946
20	Control	1	0	Centre_8	Patient_947
8	Control	8	0	Centre_8	Patient_948
24	Control	6	0	Centre_8	Patient_800
24	Control	7	0	Centre_8	Patient_850
6	Control	9	0	Centre_8	Patient_902
1	Control	9	0	Centre_8	Patient_949
15	Control	8	0	Centre_8	Patient_919
14	Control	7	0	Centre_8	Patient_950
14	Control	1	0	Centre_8	Patient_951
17	Control	6	0	Centre_8	Patient_921
9	Control	5	0	Centre_8	Patient_929
10	Control	8	0	Centre_8	Patient_952
8	Control	8	0	Centre_8	Patient_861
24	Control	1	0	Centre_8	Patient_782
9	Control	6	0	Centre_8	Patient_946
20	Control	8	0	Centre_8	Patient_953
19.6364	Control	2	0	Centre_8	Patient_859
18	Control	10	0	Centre_8	Patient_839
16	Control	7	0	Centre_8	Patient_924
26	Control	9	0	Centre_8	Patient_954
16	Control	8	0	Centre_8	Patient_886
11	Control	5	0	Centre_8	Patient_955
28	Control	3	0	Centre_8	Patient_956
10	Control	9	0	Centre_8	Patient_957
0	Control	2	0	Centre_8	Patient_951
8	Control	2	0	Centre_8	Patient_958
11	Control	2	0	Centre_8	Patient_779
19	Control	8	0	Centre_8	Patient_959
14	Control	9	0	Centre_8	Patient_960
14	Control	2	0	Centre_8	Patient_961
12	Control	9	0	Centre_8	Patient_856
28	Control	7	0	Centre_8	Patient_841
5	Control	9	0	Centre_8	Patient_962
29.1429	Control	5	0	Centre_8	Patient_859
14	Control	1	0	Centre_8	Patient_963
13	Control	4	0	Centre_8	Patient_817
6	Control	9	0	Centre_8	Patient_964
13	Control	3	0	Centre_8	Patient_965
26.6667	Control	3	0	Centre_8	Patient_859
14	Control	3	0	Centre_8	Patient_966
12	Control	4	0	Centre_8	Patient_967
10.8	Control	7	0	Centre_8	Patient_968
11	Control	7	0	Centre_8	Patient_786
12	Control	10	0	Centre_8	Patient_969
4	Control	4	0	Centre_8	Patient_832
14	Control	9	0	Centre_8	Patient_832
19	Control	2	0	Centre_8	Patient_970
26	Control	7	0	Centre_8	Patient_897
8	Control	2	0	Centre_8	Patient_971
4	Control	4	0	Centre_8	Patient_972
23	Control	5	0	Centre_8	Patient_826
7	Control	4	0	Centre_8	Patient_874
29.3333	Control	1	0	Centre_8	Patient_973
0	Control	10	0	Centre_8	Patient_974
5	Control	2	0	Centre_8	Patient_975
24	Control	8	0	Centre_8	Patient_976
19	Control	6	0	Centre_8	Patient_808
4	Control	1	0	Centre_8	Patient_832
8	Control	7	0	Centre_8	Patient_817
13	Control	7	0	Centre_8	Patient_977
21	Control	9	0	Centre_8	Patient_913
5	Control	7	0	Centre_8	Patient_978
15	Control	7	0	Centre_8	Patient_918
14	Control	3	0	Centre_8	Patient_953
9	Control	1	0	Centre_8	Patient_856
30	Control	8	0	Centre_8	Patient_807
13	Control	10	0	Centre_8	Patient_979
19	Control	2	0	Centre_8	Patient_841
9.6	Control	2	0	Centre_8	Patient_818
26	Control	9	0	Centre_8	Patient_861
22.8	Control	5	0	Centre_8	Patient_825
16.3636	Control	9	0	Centre_8	Patient_830
15.2727	Control	9	0	Centre_8	Patient_791
12	Control	9	0	Centre_8	Patient_980
3	Control	8	0	Centre_8	Patient_981
13	Control	7	0	Centre_8	Patient_982
8.72727	Control	9	0	Centre_8	Patient_983
11	Control	9	0	Centre_8	Patient_887
13	Control	9	0	Centre_8	Patient_835
17	Control	2	0	Centre_8	Patient_856
0	Control	10	0	Centre_8	Patient_984
18.5455	Control	7	0	Centre_8	Patient_985
3	Control	9	0	Centre_8	Patient_981
18	Control	1	0	Centre_8	Patient_800
6	Control	2	0	Centre_8	Patient_986
8	Control	9	0	Centre_8	Patient_814
19	Control	7	0	Centre_8	Patient_807
21	Control	1	0	Centre_8	Patient_808
13	Control	9	0	Centre_8	Patient_946
20	Control	8	0	Centre_8	Patient_987
21	Control	8	0	Centre_8	Patient_985
0	Control	4	0	Centre_8	Patient_988
26	Control	8	0	Centre_8	Patient_848
15	Control	9	0	Centre_8	Patient_989
22	Control	7	0	Centre_8	Patient_990
7	Control	4	0	Centre_8	Patient_991
20	Control	9	0	Centre_8	Patient_992
18	Control	7	0	Centre_8	Patient_784
5.33333	Control	7	0	Centre_8	Patient_993
17	Control	9	0	Centre_8	Patient_994
8	Control	7	0	Centre_8	Patient_900
30.6667	Control	9	0	Centre_8	Patient_985
8	Control	8	0	Centre_8	Patient_948
2	Control	7	0	Centre_8	Patient_995
9	Control	3	0	Centre_8	Patient_996
14	Control	2	0	Centre_8	Patient_961
27.6	Control	1	0	Centre_8	Patient_838
12	Control	9	0	Centre_8	Patient_997
11	Control	2	0	Centre_8	Patient_987
11	Control	5	0	Centre_9	Patient_998
17	Control	4	0	Centre_9	Patient_999
11	Control	7	0	Centre_9	Patient_1000
26	Control	8	0	Centre_9	Patient_1001
23	Control	7	0	Centre_9	Patient_1002
11	Control	7	0	Centre_9	Patient_1003
15	Control	7	0	Centre_9	Patient_1004
2	Control	2	0	Centre_9	Patient_1005
15	Control	3	0	Centre_9	Patient_1006
17	Control	8	0	Centre_9	Patient_1007
6	Control	3	0	Centre_9	Patient_1008
19	Control	2	0	Centre_9	Patient_1009
15	Control	8	0	Centre_9	Patient_1007
9	Control	3	0	Centre_9	Patient_1010
5	Control	3	0	Centre_9	Patient_1011
10	Control	1	0	Centre_9	Patient_1012
12	Control	9	0	Centre_9	Patient_1013
10	Control	2	0	Centre_9	Patient_1007
17	Control	1	0	Centre_9	Patient_1014
19	Control	3	0	Centre_9	Patient_1015
16	Control	8	0	Centre_9	Patient_1016
11	Control	9	0	Centre_9	Patient_1017
11	Control	2	0	Centre_9	Patient_1018
19	Control	5	0	Centre_9	Patient_1019
11	Control	3	0	Centre_9	Patient_1020
16	Control	3	0	Centre_9	Patient_1021
20	Control	7	0	Centre_9	Patient_1022
10	Control	2	0	Centre_9	Patient_1007
12	Control	2	0	Centre_9	Patient_1023
28	Control	7	0	Centre_9	Patient_1024
9	Control	2	0	Centre_9	Patient_1025
20	Control	3	0	Centre_9	Patient_1026
22	Control	2	0	Centre_9	Patient_1009
15	Control	8	0	Centre_9	Patient_1027
5	Control	8	0	Centre_9	Patient_1028
9	Control	1	0	Centre_9	Patient_1013
23	Control	7	0	Centre_9	Patient_1029
11	Control	4	0	Centre_9	Patient_1030
18	Control	8	0	Centre_9	Patient_1031
20	Control	9	0	Centre_9	Patient_1032
12	Control	8	0	Centre_9	Patient_1018
33.6	Control	7	0	Centre_9	Patient_1033
14	Control	4	0	Centre_9	Patient_1034
11	Control	5	0	Centre_9	Patient_1035
17	Control	9	0	Centre_9	Patient_1036
14	Control	9	0	Centre_9	Patient_1027
15	Control	7	0	Centre_9	Patient_1037
14	Control	1	0	Centre_9	Patient_1038
14	Control	2	0	Centre_9	Patient_1039
8	Control	9	0	Centre_9	Patient_1040
11	Control	4	0	Centre_9	Patient_1041
16	Control	6	0	Centre_9	Patient_1042
20.4	Control	3	0	Centre_9	Patient_1043
21	Control	8	0	Centre_9	Patient_1044
19	Control	8	0	Centre_9	Patient_1045
12	Control	9	0	Centre_9	Patient_1046
4	Control	4	0	Centre_9	Patient_1047
18	Control	5	0	Centre_9	Patient_1014
2	Control	3	0	Centre_9	Patient_1000
22	Control	3	0	Centre_9	Patient_1019
8	Control	3	0	Centre_9	Patient_1048
14	Control	1	0	Centre_9	Patient_1049
9	Control	6	0	Centre_9	Patient_1050
29	Control	9	0	Centre_9	Patient_1051
5	Control	9	0	Centre_9	Patient_1003
1	Control	1	0	Centre_9	Patient_1052
10	Control	9	0	Centre_9	Patient_1053
12	Control	3	0	Centre_9	Patient_1054
43.6364	Control	1	0	Centre_9	Patient_1055
11	Control	9	0	Centre_9	Patient_1056
24	Control	9	0	Centre_9	Patient_1057
18	Control	7	0	Centre_9	Patient_1054
25	Control	2	0	Centre_9	Patient_1002
10	Control	1	0	Centre_9	Patient_1058
11	Control	1	0	Centre_9	Patient_1032
10	Control	9	0	Centre_9	Patient_1059
25	Control	5	0	Centre_9	Patient_1049
14	Control	1	0	Centre_9	Patient_1060
14.4	Control	8	0	Centre_9	Patient_1061
0	Control	9	0	Centre_9	Patient_1062
22	Control	1	0	Centre_9	Patient_1063
27	Control	6	0	Centre_9	Patient_1064
15	Control	4	0	Centre_9	Patient_1065
9	Control	1	0	Centre_9	Patient_1023
28	Control	7	0	Centre_9	Patient_1066
8	Control	7	0	Centre_9	Patient_1067
12	Control	9	0	Centre_9	Patient_1068
11	Control	4	0	Centre_9	Patient_1069
16	Control	5	0	Centre_9	Patient_1070
6	Control	3	0	Centre_9	Patient_1071
15	Control	5	0	Centre_9	Patient_1072
14	Control	6	0	Centre_9	Patient_1073
20	Control	2	0	Centre_9	Patient_1074
21	Control	8	0	Centre_9	Patient_1031
12	Control	2	0	Centre_9	Patient_1029
10	Control	5	0	Centre_9	Patient_1075
7	Control	1	0	Centre_9	Patient_1076
19	Control	1	0	Centre_9	Patient_1077
26	Control	9	0	Centre_9	Patient_1078
18	Control	8	0	Centre_9	Patient_1079
13	Control	1	0	Centre_9	Patient_1030
10	Control	4	0	Centre_9	Patient_1080
16	Control	8	0	Centre_9	Patient_1081
16	Control	7	0	Centre_9	Patient_1082
42	Control	1	0	Centre_9	Patient_1083
18	Control	3	0	Centre_9	Patient_1084
17	Control	8	0	Centre_9	Patient_1085
3	Control	3	0	Centre_9	Patient_1086
18	Control	7	0	Centre_9	Patient_1079
11	Control	1	0	Centre_9	Patient_1039
15	Control	8	0	Centre_9	Patient_1016
8	Control	3	0	Centre_9	Patient_1087
3	Control	8	0	Centre_9	Patient_1088
14	Control	7	0	Centre_9	Patient_1062
0	Control	9	0	Centre_9	Patient_1020
19	Control	3	0	Centre_9	Patient_1089
11	Control	8	0	Centre_9	Patient_1090
27	Control	7	0	Centre_9	Patient_1001
16	Control	7	0	Centre_9	Patient_1091
6	Control	2	0	Centre_9	Patient_1092
17	Control	3	0	Centre_9	Patient_1005
8	Control	1	0	Centre_9	Patient_1093
12	Control	7	0	Centre_9	Patient_1094
13	Control	1	0	Centre_9	Patient_1095
22	Control	3	0	Centre_9	Patient_1096
21	Control	2	0	Centre_9	Patient_1020
27	Control	7	0	Centre_9	Patient_1097
14	Control	9	0	Centre_9	Patient_1098
18	Control	9	0	Centre_9	Patient_1099
7	Control	8	0	Centre_9	Patient_1076
11	Control	1	0	Centre_9	Patient_1097
0	Control	1	0	Centre_9	Patient_1100
10	Control	4	0	Centre_9	Patient_1043
17	Control	7	0	Centre_9	Patient_1046
15	Control	4	0	Centre_9	Patient_1101
18	Control	4	0	Centre_9	Patient_1102
17	Control	1	0	Centre_9	Patient_1019
10	Control	5	0	Centre_9	Patient_1103
24	Control	9	0	Centre_9	Patient_1057
14	Control	1	0	Centre_9	Patient_1029
13.3333	Control	1	0	Centre_9	Patient_1010
17	Control	7	0	Centre_9	Patient_1104
7	Control	8	0	Centre_9	Patient_1105
0	Control	7	0	Centre_9	Patient_1106
25	Control	7	0	Centre_9	Patient_1107
23	Control	3	0	Centre_9	Patient_1013
7	Control	7	0	Centre_9	Patient_999
28	Control	2	0	Centre_9	Patient_1108
23	Control	7	0	Centre_9	Patient_1109
0	Control	6	0	Centre_9	Patient_1110
14	Control	9	0	Centre_9	Patient_1094
13	Control	3	0	Centre_9	Patient_1104
15	Control	2	0	Centre_9	Patient_1099
13	Control	1	0	Centre_9	Patient_1071
34	Control	7	0	Centre_9	Patient_1111
12	Control	6	0	Centre_9	Patient_1087
22	Control	9	0	Centre_9	Patient_1112
6	Control	9	0	Centre_9	Patient_1113
13	Control	6	0	Centre_9	Patient_1114
17	Control	8	0	Centre_9	Patient_1108
3	Control	2	0	Centre_9	Patient_1049
7	Control	6	0	Centre_9	Patient_1062
4	Control	4	0	Centre_9	Patient_1071
8	Control	4	0	Centre_9	Patient_1106
14	Control	5	0	Centre_9	Patient_1115
12	Control	7	0	Centre_9	Patient_1116
20	Control	8	0	Centre_9	Patient_1029
31	Control	9	0	Centre_9	Patient_1002
25	Control	7	0	Centre_9	Patient_1101
6	Control	7	0	Centre_9	Patient_1117
10	Control	7	0	Centre_9	Patient_1118
1	Control	6	0	Centre_9	Patient_1119
10	Control	9	0	Centre_9	Patient_1043
22	Control	2	0	Centre_9	Patient_1056
20	Control	1	0	Centre_9	Patient_1031
10	Control	8	0	Centre_9	Patient_1053
11	Control	8	0	Centre_9	Patient_1120
17	Control	6	0	Centre_9	Patient_1121
14.1818	Control	5	0	Centre_9	Patient_1122
28	Control	2	0	Centre_9	Patient_1123
8	Control	5	0	Centre_9	Patient_1124
24	Control	4	0	Centre_9	Patient_1098
17	Control	2	0	Centre_9	Patient_1125
16	Control	5	0	Centre_9	Patient_1039
29	Control	7	0	Centre_9	Patient_1031
15	Control	9	0	Centre_9	Patient_1118
23	Control	9	0	Centre_9	Patient_1063
23	Control	7	0	Centre_9	Patient_1003
9	Control	7	0	Centre_9	Patient_1126
23	Control	2	0	Centre_9	Patient_1109
14	Control	6	0	Centre_9	Patient_1082
14	Control	6	0	Centre_9	Patient_1005
6	Control	7	0	Centre_9	Patient_1127
24	Control	6	0	Centre_9	Patient_1019
8	Control	2	0	Centre_9	Patient_1128
3	Control	8	0	Centre_9	Patient_1038
15	Control	3	0	Centre_9	Patient_1013
12	Control	4	0	Centre_9	Patient_1048
13	Control	8	0	Centre_9	Patient_1031
19	Control	6	0	Centre_9	Patient_1097
19	Control	2	0	Centre_9	Patient_1107
5	Control	1	0	Centre_9	Patient_1129
27.2727	Control	9	0	Centre_9	Patient_1130
7	Control	9	0	Centre_9	Patient_1131
30.8571	Control	7	0	Centre_9	Patient_1033
17	Control	9	0	Centre_9	Patient_1132
2	Control	7	0	Centre_9	Patient_1133
18	Control	6	0	Centre_9	Patient_1134
14	Control	1	0	Centre_9	Patient_1080
11	Control	7	0	Centre_9	Patient_1061
18	Control	8	0	Centre_9	Patient_1135
8	Control	9	0	Centre_9	Patient_1076
15	Control	5	0	Centre_9	Patient_1136
16	Control	9	0	Centre_9	Patient_1137
16.3636	Control	4	0	Centre_9	Patient_1138
4	Control	1	0	Centre_9	Patient_1139
12	Control	7	0	Centre_9	Patient_1048
17	Control	4	0	Centre_9	Patient_1016
8	Control	1	0	Centre_9	Patient_1140
21	Control	9	0	Centre_9	Patient_1141
9	Control	8	0	Centre_9	Patient_1033
7	Control	7	0	Centre_9	Patient_1142
16	Control	4	0	Centre_9	Patient_1001
16.3636	Control	4	0	Centre_9	Patient_1105
12	Control	3	0	Centre_9	Patient_1012
15	Control	9	0	Centre_9	Patient_1008
8	Control	7	0	Centre_9	Patient_1007
20	Control	9	0	Centre_9	Patient_1143
17	Control	6	0	Centre_9	Patient_1010
15	Control	3	0	Centre_9	Patient_1072
17	Control	4	0	Centre_9	Patient_1041
11	Control	7	0	Centre_9	Patient_1144
9	Control	4	0	Centre_9	Patient_1039
19	Control	1	0	Centre_9	Patient_1145
13	Control	4	0	Centre_9	Patient_1089
24	Control	4	0	Centre_9	Patient_1013
19	Control	5	0	Centre_9	Patient_1146
15	Control	6	0	Centre_9	Patient_1116
19	Control	7	0	Centre_9	Patient_1072
12	Control	5	0	Centre_9	Patient_1114
17	Control	9	0	Centre_9	Patient_1007
3	Control	4	0	Centre_9	Patient_1061
3	Control	5	0	Centre_9	Patient_1041
16	Control	7	0	Centre_9	Patient_1016
7	Control	1	0	Centre_9	Patient_1147
19	Control	9	0	Centre_9	Patient_1148
25	Control	3	0	Centre_9	Patient_1149
25	Control	5	0	Centre_9	Patient_1013
9	Control	6	0	Centre_9	Patient_1043
24	Control	3	0	Centre_9	Patient_1002
21	Control	8	0	Centre_9	Patient_1008
15	Control	7	0	Centre_9	Patient_1126
0	Control	3	0	Centre_9	Patient_1022
15	Control	9	0	Centre_9	Patient_1004
29.4545	Control	2	0	Centre_9	Patient_1150
23	Control	7	0	Centre_9	Patient_1077
15	Control	2	0	Centre_9	Patient_1121
20	Control	7	0	Centre_9	Patient_1079
5	Control	1	0	Centre_9	Patient_1151
5	Control	1	0	Centre_9	Patient_1097
19	Control	9	0	Centre_9	Patient_1152
5	Control	7	0	Centre_9	Patient_1003
19	Control	7	0	Centre_9	Patient_1153
5	Control	9	0	Centre_9	Patient_1154
[truncated: 2,596 more rows]

## Sheet: Meta Data
HONOS_Score	HONOS Score
Treatment_Arm	Whether the participant's Trust was within the intervention period when the measurement was taken
Study_Month	The month within the study
Exposure_Month	The number of months the participant's trust was within the intervention period
Centre	Anonymised mental health trust
PatID	Anonymised patient id
